# Supplementary material for: Variation in temperature of peak trait performance constrains adaptation of arthropod populations to climatic warming
Source: PubMed Central journal article supplement (PMC10927549; doi:10.1038/s41559-023-02301-8), 2024-01-25
Supplement: 41559_2023_2301_MOESM1_ESM.pdf [file 41559_2023_2301_MOESM1_ESM.pdf]

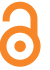

---

# Variation in temperature of peak trait performance constrains adaptation of arthropod populations to climatic warming

---

In the format provided by the authors and unedited

---

# 1 Contents

|    |                                                                                                      |          |
|----|------------------------------------------------------------------------------------------------------|----------|
| 2  | <b>1 Supplementary Results</b>                                                                       | <b>2</b> |
| 3  | 1.1 Trait-level “hotter-is-better” patterns . . . . .                                                | 2        |
| 4  | 1.2 Correlation of thermal fitness with peak trait performance . . . . .                             | 4        |
| 5  | 1.3 Evidence of trait-level thermal adaptation . . . . .                                             | 5        |
| 6  | 1.4 Distributions of trait-level thermal sensitivities . . . . .                                     | 8        |
| 7  | 1.5 Trait-level thermal performance curves . . . . .                                                 | 9        |
| 8  | 1.6 Species-level temperature dependencies of $r_m$ . . . . .                                        | 13       |
| 9  | 1.7 Sensitivity of the results to the parameterisation of fecundity loss rate ( $\kappa$ ) . . . . . | 14       |
| 10 | 1.7.1 Effect on the trait sensitivity results . . . . .                                              | 15       |
| 11 | 1.7.2 The selection gradients revisited . . . . .                                                    | 15       |
| 12 | 1.8 Macroevolutionary patterns and phylogenetic constraints . . . . .                                | 17       |

# 1 Supplementary Results

## 1.1 Trait-level “hotter-is-better” patterns

Across diverse levels of biological organisation, many biological rates (e.g., development, population growth) are expected to scale to the negative quarter-power with mass-specific metabolic rate ( $M^{-0.25}$ ) but such scaling may not exist in arthropods [1]. Therefore, prior to testing for trait-level hotter-is-better patterns, trait  $B_{pk}$ s were temperature- and body mass-corrected to account for how optimal thermal fitness ( $r_{opt}$ ) emerges from the TPCs of its underlying traits which in turn depend on scaling relationships between body size and metabolic rate in individual organisms [2]. Specifically, to obtain the exponents for these relationships, we fitted OLS models in log-log scale (i.e.,  $\log(B_{pk}) \sim \log(M) + kT$ ; where  $M$  is fresh wet mass in milligrams,  $k$  is the Boltzmann constant (Main text Table 1) and  $T$  is the trait value at 273.15°K (0°C)) to the  $B_{pk}$  estimates (Main text Fig. 5C and Supplementary Figs. 1 & 2) and the body mass data (Appendix 1). We also corrected  $r_{opt}$  to account for size scaling in its underlying traits (Main text Fig. 5B and Supplementary Fig. 2). If fresh mass for a particular species was not provided in the original study, we used mass estimates from other studies on that or a closely related species.

Our theory assumes that a “hotter-is-better” pattern exists in the underlying traits. In particular, given its dominant effect,  $\alpha$  should definitely exhibit this pattern. While data on this within-species are not currently available, we tested this assumption with data across species (Main text Fig. 5B; SM Fig. 1). We observe a significant “hotter-is-better” pattern for development time ( $\alpha$ ; Main text Fig. 5B) and maximum fecundity ( $b_{max}$ ) (SM Fig. 1A and D), whereas the slopes for  $z_J$  and  $z$  are non significantly positive and negative, respectively. *Anoplophora glabripennis* was excluded from this analysis because its  $r_{opt}$  was extremely low ( $r_{opt}=0.01$ ). With this species included, the slope for seen in Main text Fig. 5C becomes  $0.09 \pm 0.08$  (95% CI),  $R^2=0.21$  and  $p=0.03$ .

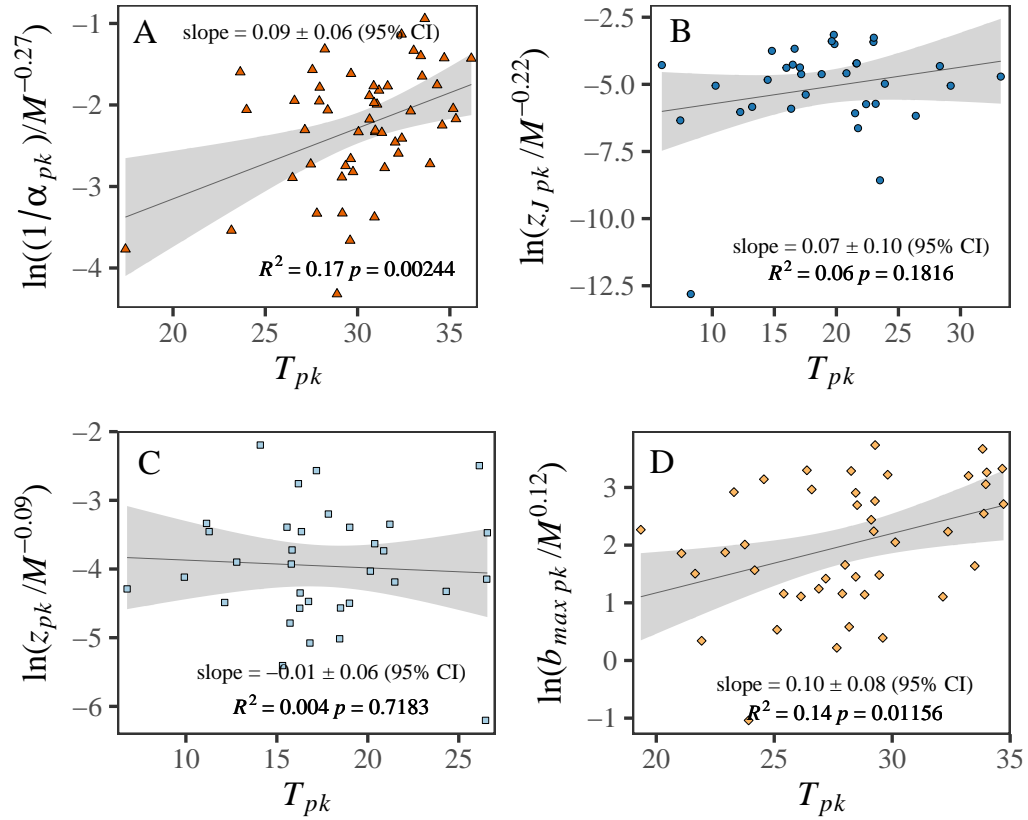

**Supplementary Figure 1:** Test of the “hotter-is-better” pattern across arthropod taxa. The “hotter-is-better” pattern is significant in the body size-corrected (wet mass, mg)  $1/\alpha$  (A;  $n=51$  independent species) and  $b_{max}$  (D;  $n=44$  independent species) data, but at best weak for  $z_J$  (B;  $n=34$  independent species) and  $z$  (C;  $n=34$  independent species), suggesting relatively greater biochemical adaptation to overcome thermodynamic constraints in these two traits [3, 4], insufficient data (note the narrow range of temperatures on x-axis for  $b_{max}$  in particular) [5], or both. The lines are OLS regression (with 95% prediction bounds) fitted to the species’ log-transformed median  $B_{pk}$ s (symbols) of the trait plotted against their respective median  $T_{pk}$ s.

35 1.2 Correlation of thermal fitness with peak trait performance

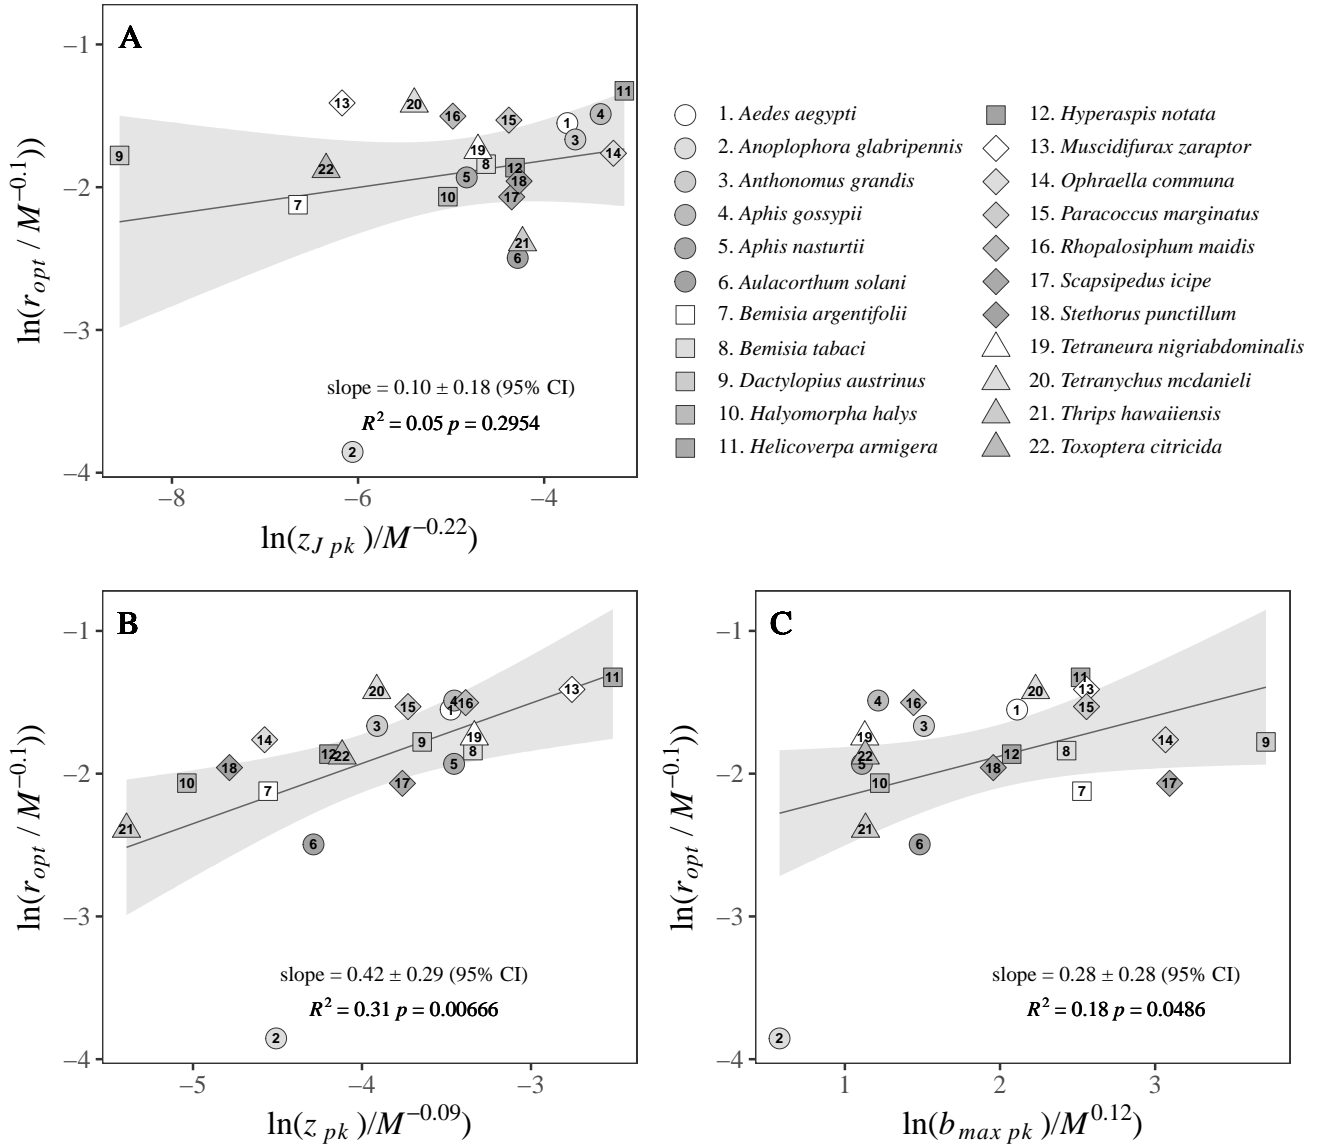

**Supplementary Figure 2: Relationship between  $r_{opt}$  and peak A) juvenile mortality rate, B) adult mortality rate and C) fecundity rate.** The lines are OLS regression (with 95% prediction bounds) fitted to the species' ( $n=22$ ) log-transformed mass-corrected median  $r_{opt}$ s (symbols) plotted against their respective log-transformed mass-corrected median trait  $B_{pk}$ s.

### 36 1.3 Evidence of trait-level thermal adaptation

37 To test for trait-level thermal adaptation, we first analysed the relationships between trait  $T_{pk}$ s and  
 38 latitudes (i.e., the geographical locations where each experimental species originated from). All traits'  $T_{pk}$ s  
 39 declined with increasing latitude, which suggests that species, albeit weakly, are adapted to their local  
 40 environments (SM Fig. 3), consistent with the patterns seen in other groups [3, 6]. Because environmental  
 41 variables other than temperature also vary with latitude, we also analyzed the relationship between traits'  
 42  $T_{pk}$ s and rearing temperatures (i.e., the species' laboratory rearing temperatures; SM Fig. 4), and rearing  
 43 temperatures and latitudes (SM Fig. 5). Trait  $T_{pk}$ s increased significantly with rearing temperatures (SM  
 44 Fig. 4) and decreased significantly with increasing latitudes. These results suggest that species originating  
 45 from warmer climates were reared under warmer temperatures in the lab. Together, these results indicate  
 46 the existence of significant existing trait-level thermal adaption amongst the species used in the present  
 47 study.

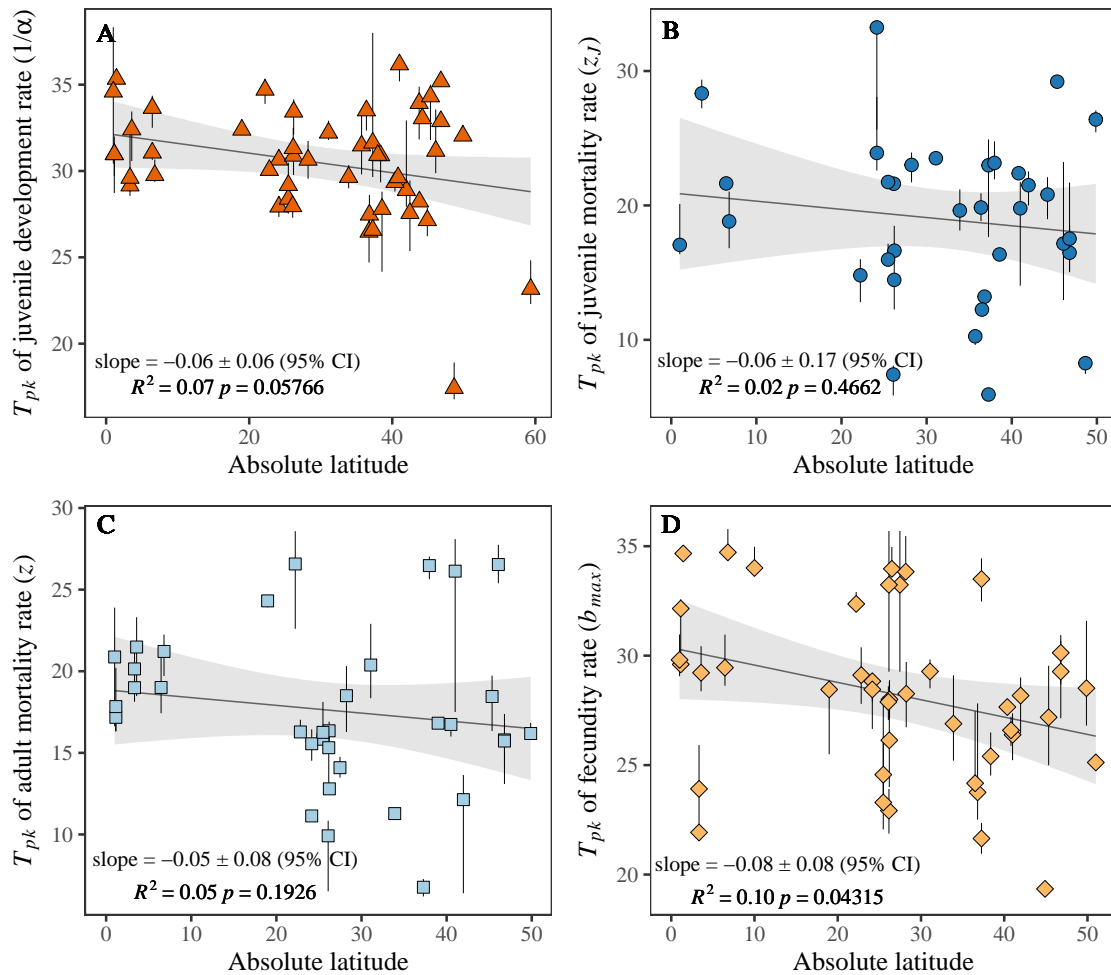

**Supplementary Figure 3:** Relationship between latitude and  $T_{pk}$ s of A) juvenile development rate ( $1/\alpha$ ;  $n=49$  species), B) juvenile mortality rate ( $n=34$  species), C) adult mortality rate ( $n=34$  species) and D) fecundity rate ( $n=44$  species). The lines are OLS regression (with 95% prediction bounds) fitted to the species' median  $T_{pk}$  estimates (symbols) plotted against absolute latitude. Bootstrapping (residual resampling) was used to calculate 95% prediction bounds for each TPC (SM Figs. 7, 8, 9, 10), which also yielded the confidence intervals around the  $T_{pk}$  estimates shown.

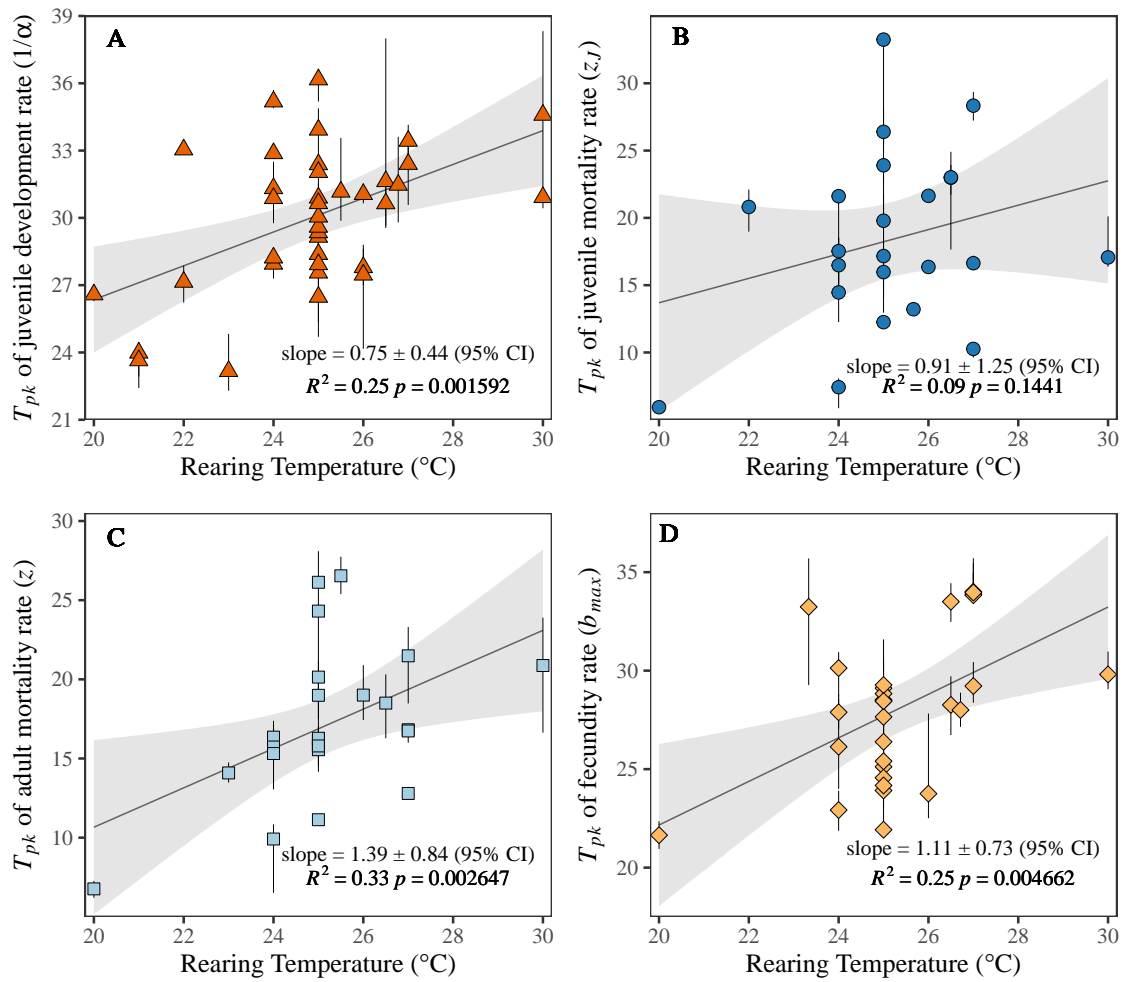

**Supplementary Figure 4:** Relationship between rearing temperature and  $T_{pks}$  of A) juvenile development rate ( $1/\alpha$ ;  $n=37$  species), B) juvenile mortality rate ( $n=24$  species), C) adult mortality rate ( $n=25$  species) and D) fecundity rate ( $n=30$  species). The lines are OLS regression (with 95% prediction bounds) fitted to the species' median  $T_{pk}$  estimates (symbols) plotted against rearing temperature. Bootstrapping (residual resampling) was used to calculate 95% prediction bounds for each TPC (SM Figs. 7, 8, 9, 10), which also yielded the confidence intervals around the  $T_{pk}$  estimates shown.

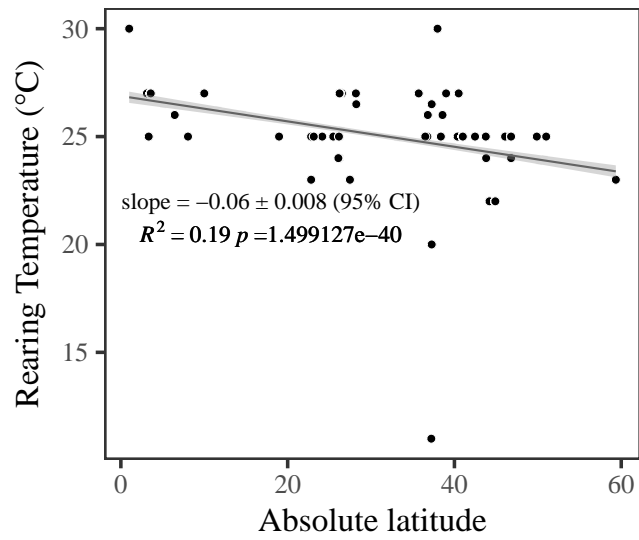

**Supplementary Figure 5:** Relationship between rearing temperature and absolute latitude. The lines are OLS regression (with 95% prediction bounds) fitted to the species' ( $n=45$ ) rearing temperatures plotted against their respective latitudes.



48 1.4 Distributions of trait-level thermal sensitivities

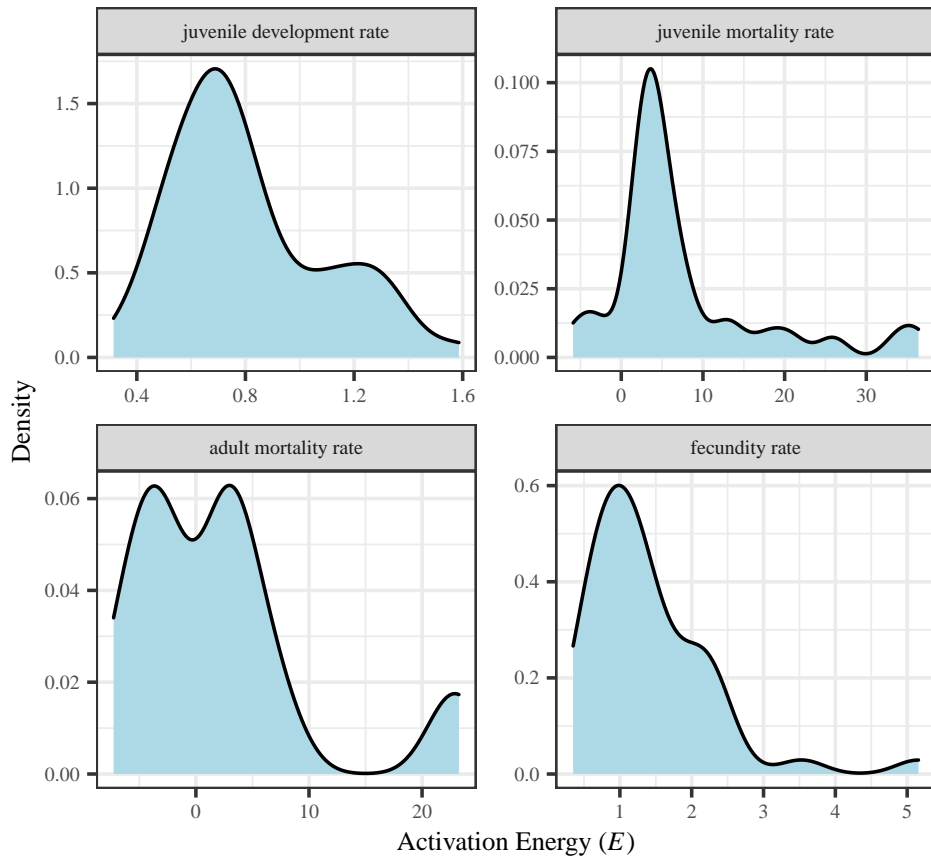

**Supplementary Figure 6:** Distribution of estimated activation energy values for all fitted traits and species.

49 1.5 Trait-level thermal performance curves

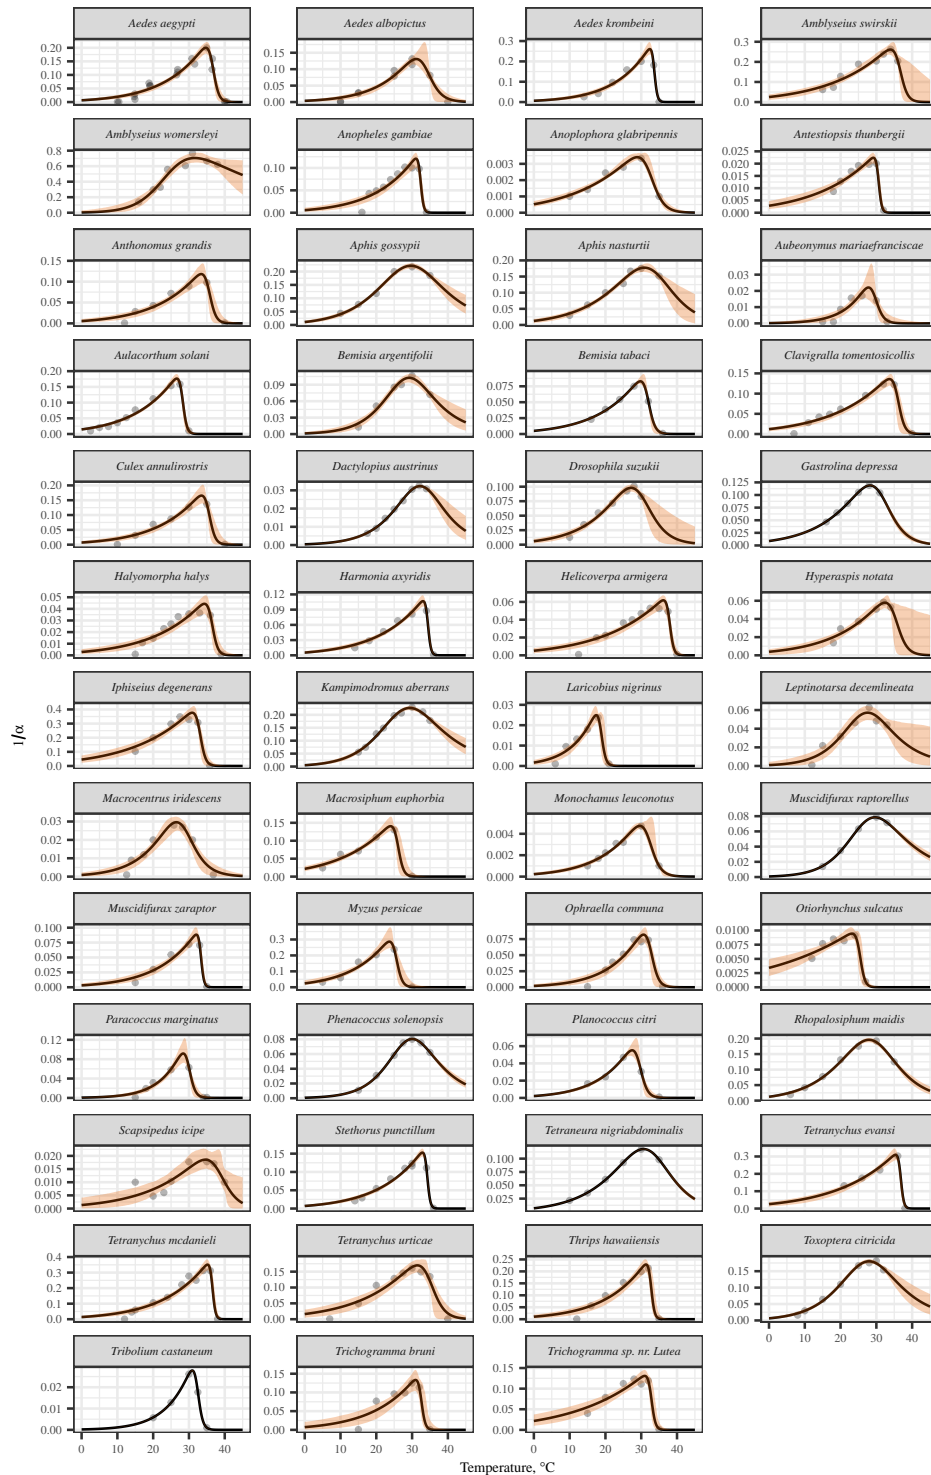

**Supplementary Figure 7:** Thermal Performance Curve fits for all species: Development Rate. Bootstrapping (residual resampling) was used to calculate 95% prediction bounds (shaded areas) for each TPC. These prediction bounds indicate statistical/data uncertainty arising from fitting the TPC model (Main text Equation 3) to TPC data where the peak was only captured through a single trait measurement at or close to that temperature. As such, this does not affect our results qualitatively.

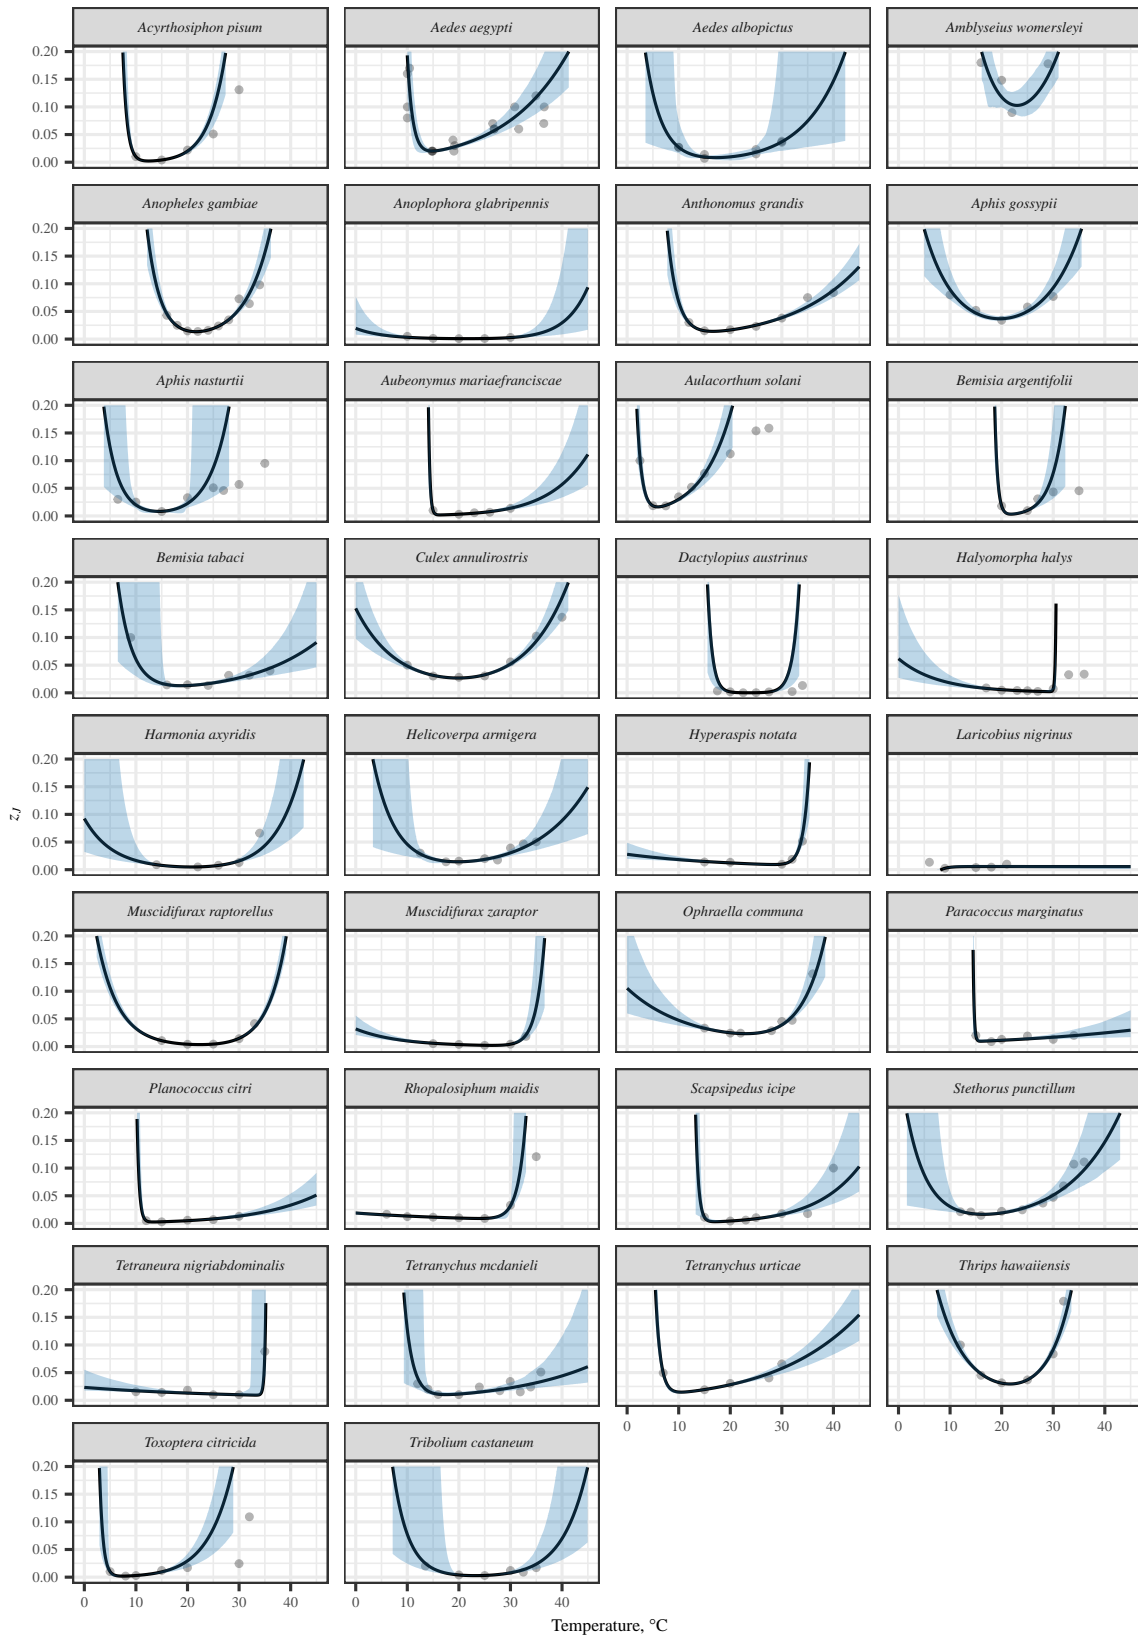

**Supplementary Figure 8:** Thermal Performance Curve fits for all species: Juvenile Mortality. Bootstrapping (residual resampling) was used to calculate 95% prediction bounds (shaded areas) for each TPC.

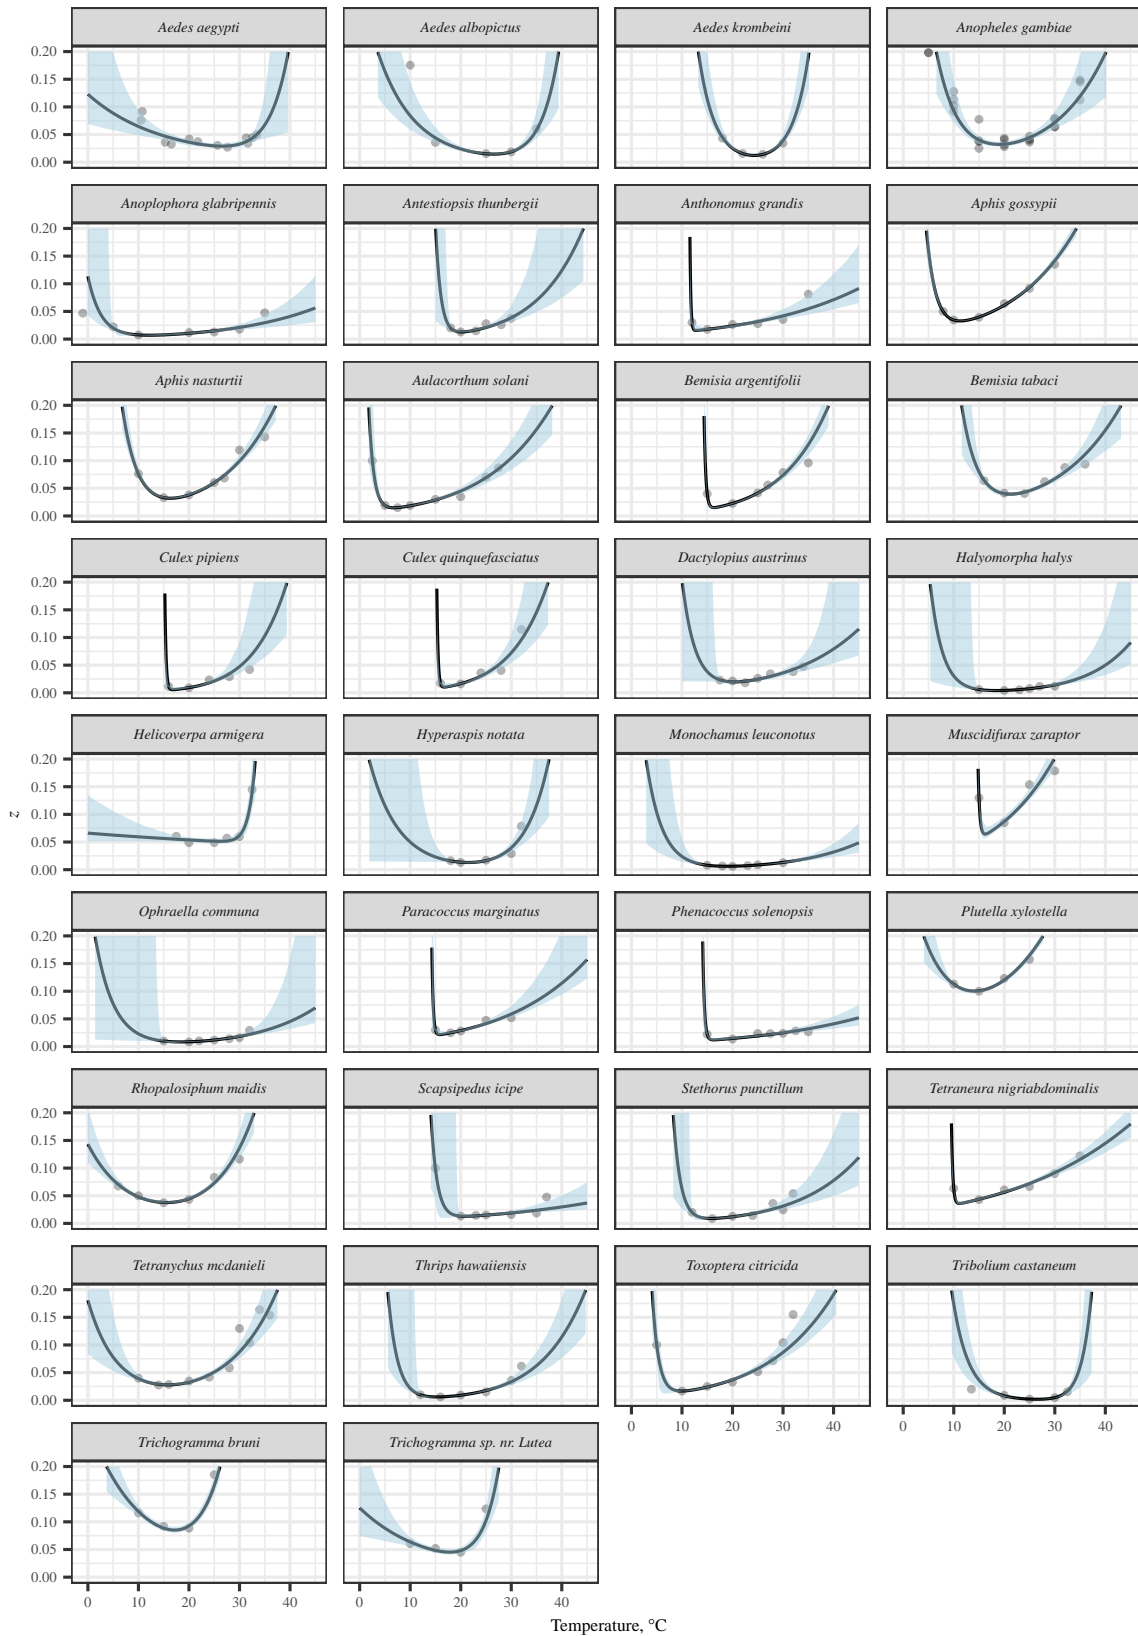

**Supplementary Figure 9:** Thermal Performance Curve fits for all species: Adult Mortality. Bootstrapping (residual resampling) was used to calculate 95% prediction bounds (shaded areas) for each TPC.

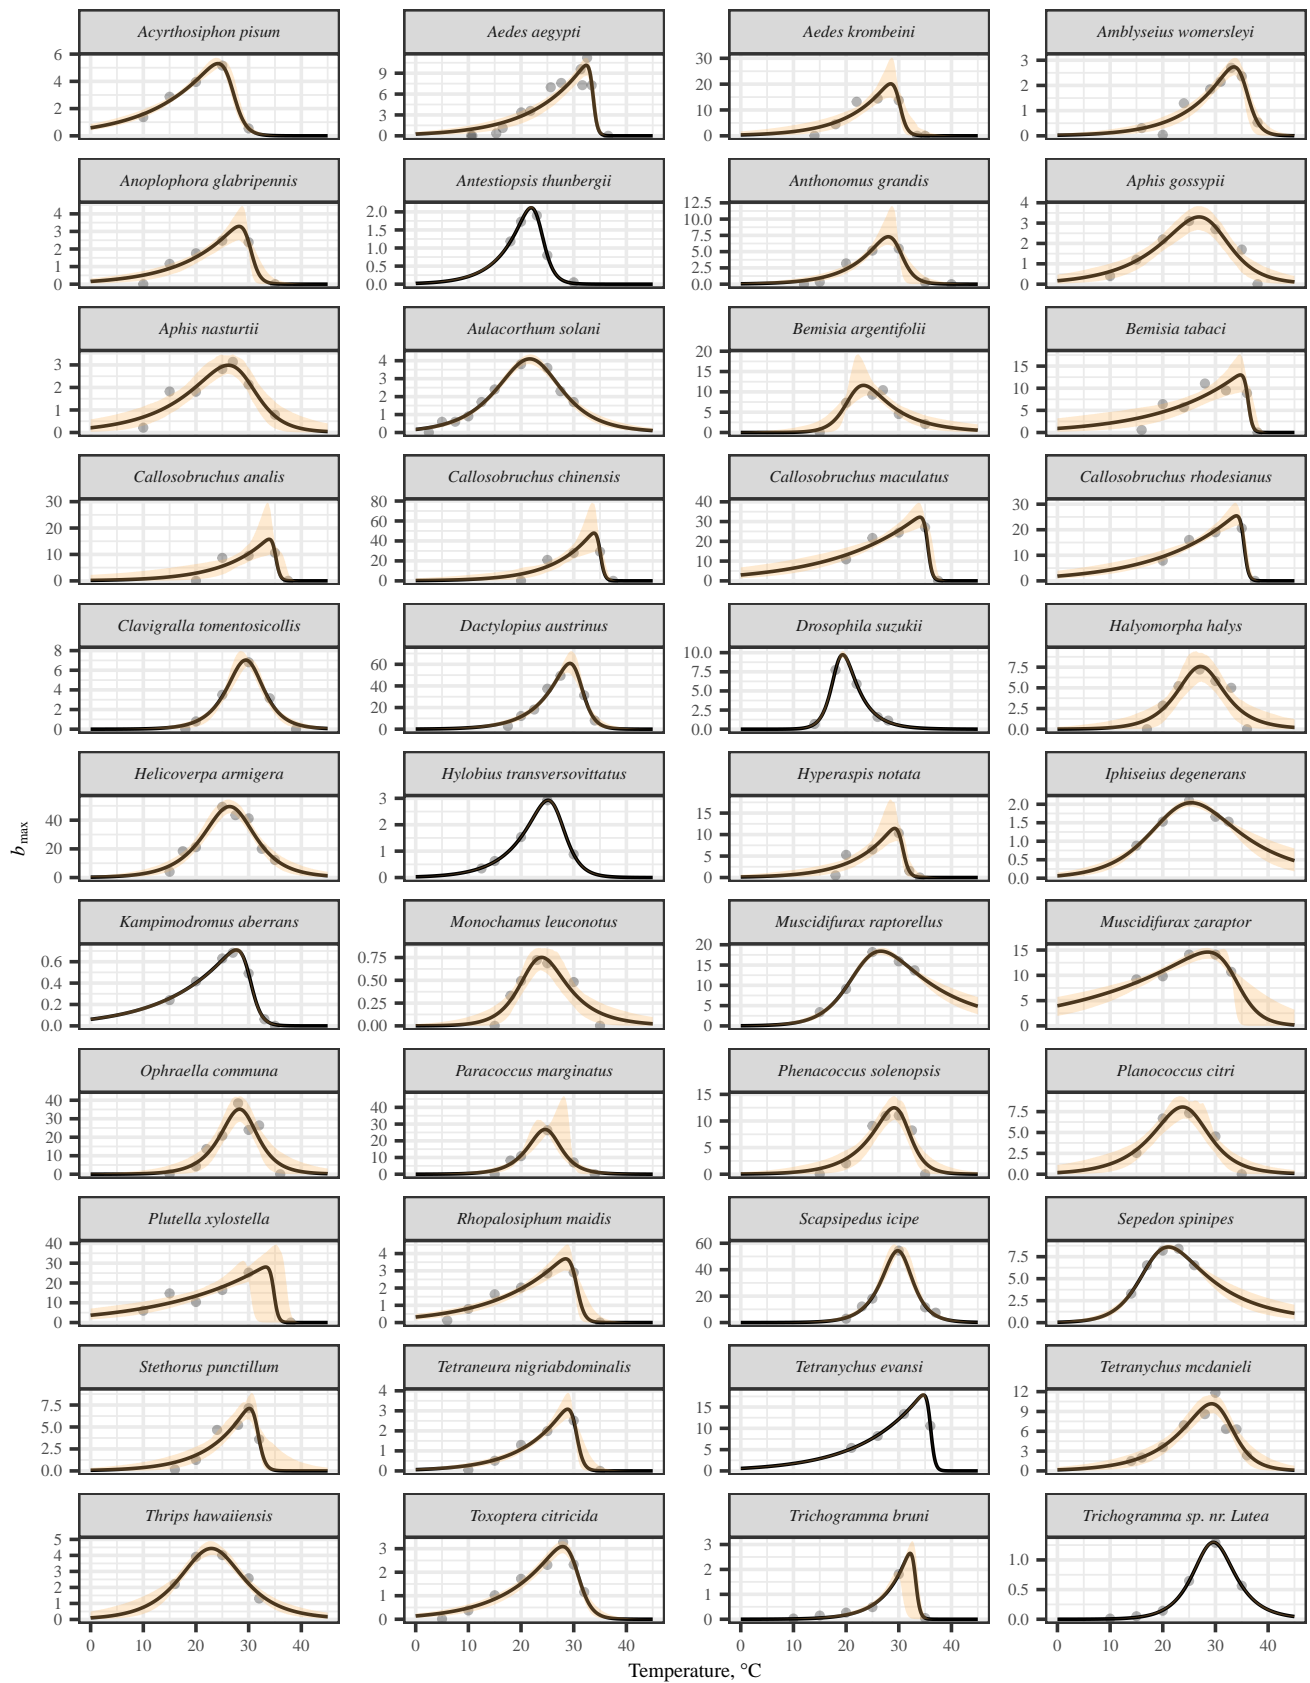

**Supplementary Figure 10:** Thermal Performance Curve fits for all species: Fecundity. Bootstrapping (residual resampling) was used to calculate 95% prediction bounds (shaded areas) for each TPC.

50 1.6 Species-level temperature dependencies of  $r_m$

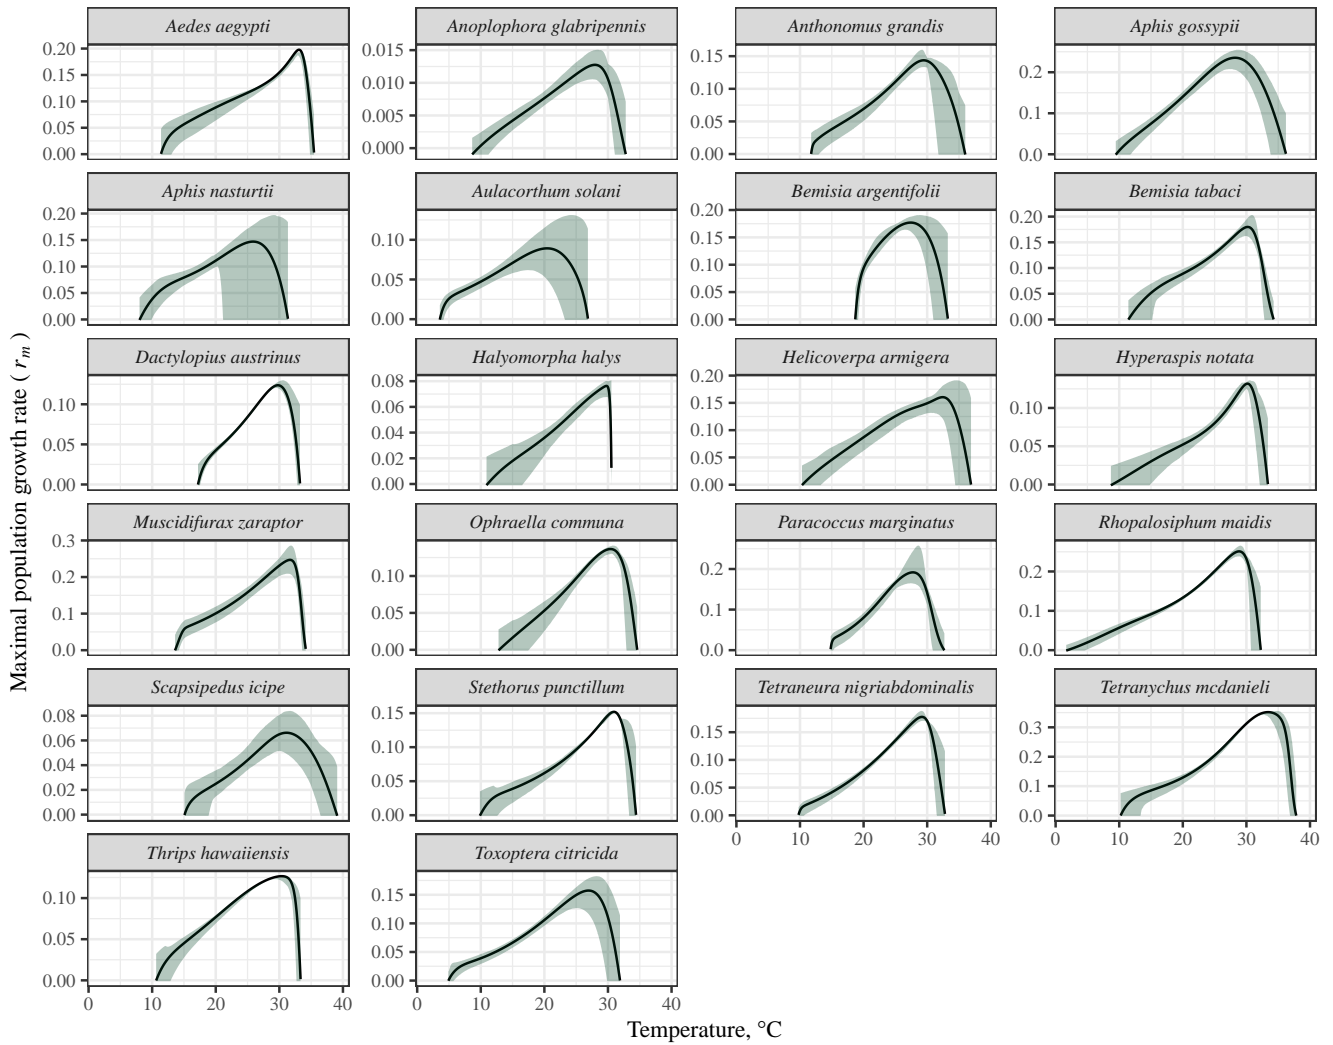

**Supplementary Figure 11:** Thermal Performance Curve fits for all species:  $r_m$ . Bootstrapping (residual resampling) was used to calculate 95% prediction bounds (shaded areas) for each TPC.

51 **1.7 Sensitivity of the results to the parameterisation of fecundity loss rate ( $\kappa$ )**

52 Fecundity typically declines over time, which can have significant impacts on the lifetime reproduction of  
53 individuals and therefore fitness. The rate at which fecundity declines with age ( $\kappa$ ) may be temperature-  
54 dependent, but there appears to be practically no existing data on this for arthropods. Therefore, here we  
55 quantify the sensitivity of our theoretical predictions to changes in parameterisation of baseline fecundity  
56 loss rate (the normalisation constant,  $\kappa_0$ ). Specifically, we re-evaluate our trait sensitivity analyses, as  
57 well as our calculation of selection gradient by varying  $\kappa_0$  across two extreme values, around the value we  
58 have used to generate the main results (0.1). Supplementary Figure 12 shows how changing  $\kappa_0$  affects the  
59 shape of the fecundity curve at any given temperature.

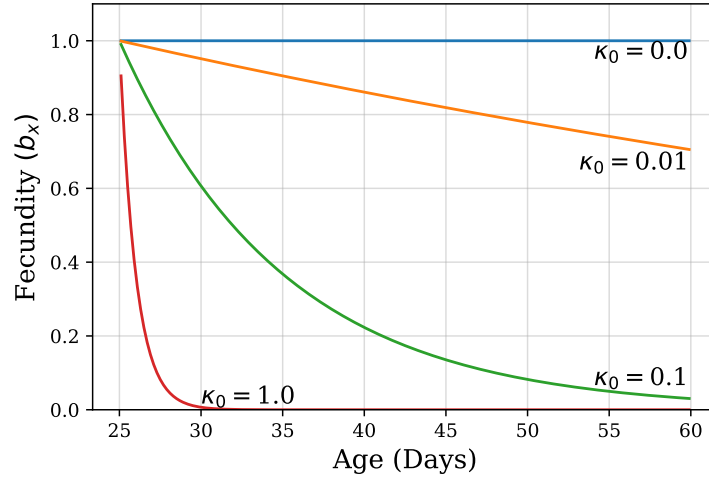

**Supplementary Figure 12:** Sensitivity of the fecundity TPC to changes in  $\kappa_0$ .

60 Supplementary Figure 13 shows that the TPC shape for  $\kappa$  remains qualitatively the same (for the two  
61 meaningful extreme values of  $\kappa_0$ ):

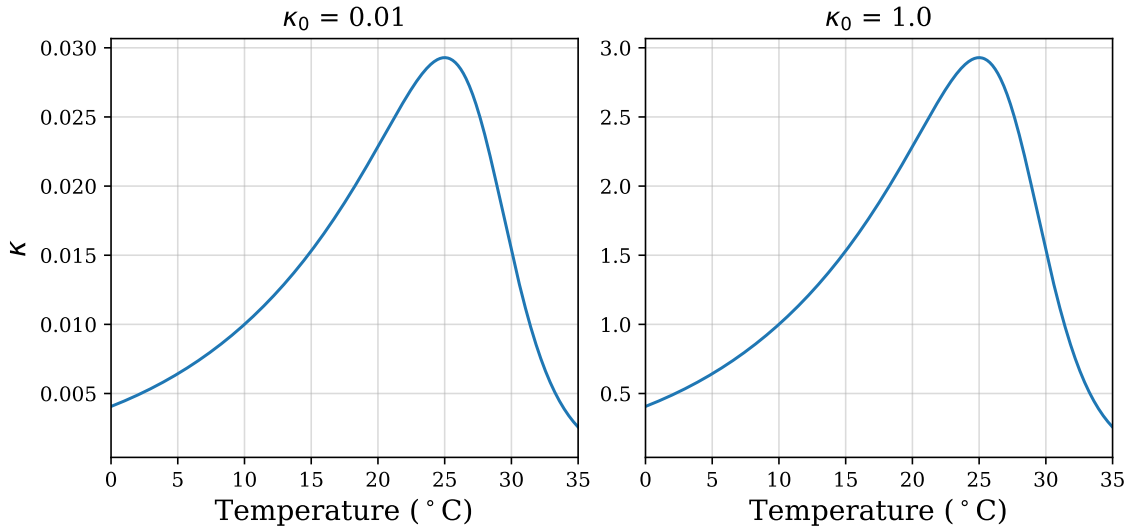

**Supplementary Figure 13:** Insensitivity of the  $\kappa$  curve to meaningfully extreme  $\kappa_0$  values.

62 **1.7.1 Effect on the trait sensitivity results**

63 First, we re-evaluate the trait sensitivity analysis results (SM Fig. 14). As expected, in the case where  
64 baseline kappa ( $\kappa_0$ ) is lower, maximum fecundity ( $b_{max}$ ) becomes more important relative to  $\kappa$ , leaving  
65 the order of importance of the 5 traits the same as for the intermediate case ( $\kappa_0=0.1$ ) upon which our  
66 main results are based.

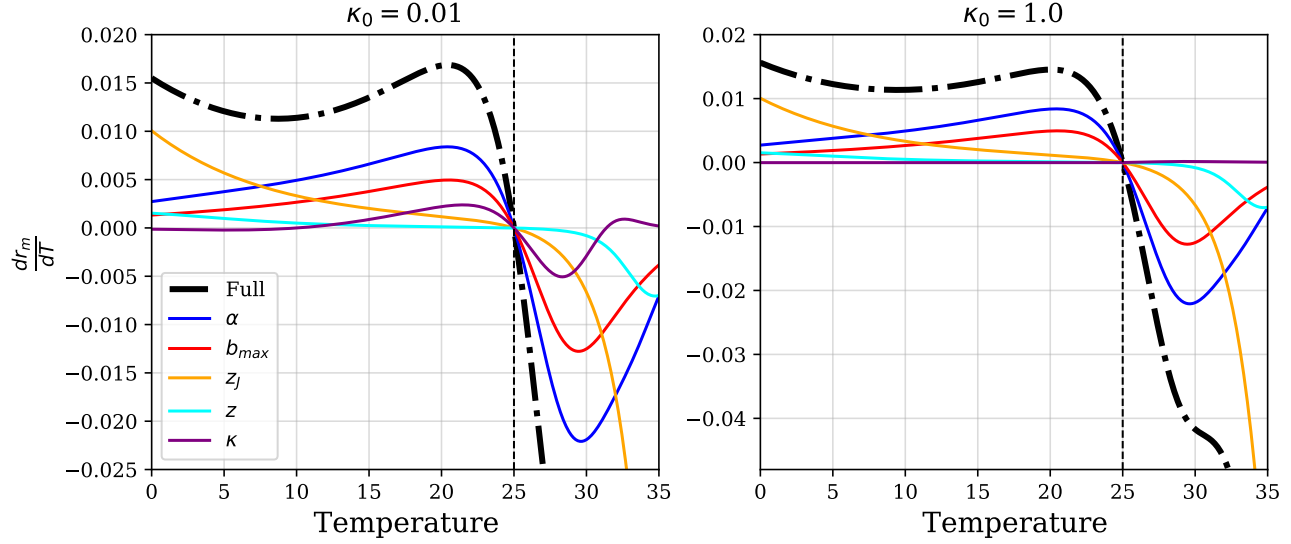

Supplementary Figure 14: Re-evaluation of the results of the trait sensitivity analysis

67 **1.7.2 The selection gradients revisited**

68 Next we re-evaluate the  $r_m$  TPC and selection gradients as above. We focus only on the dominant trait  
69  $\alpha$  because the order of the strengths of selection gradients is bound to remain unchanged due to the  
70 unchanged order of trait sensitivity irrespective of the  $\kappa_0$  value (previous section). Supplementary Figure  
71 15 shows that the selection gradient remains qualitatively unchanged, with overall  $r_m$  lower when  $\kappa_0$  is  
72 high, as expected.



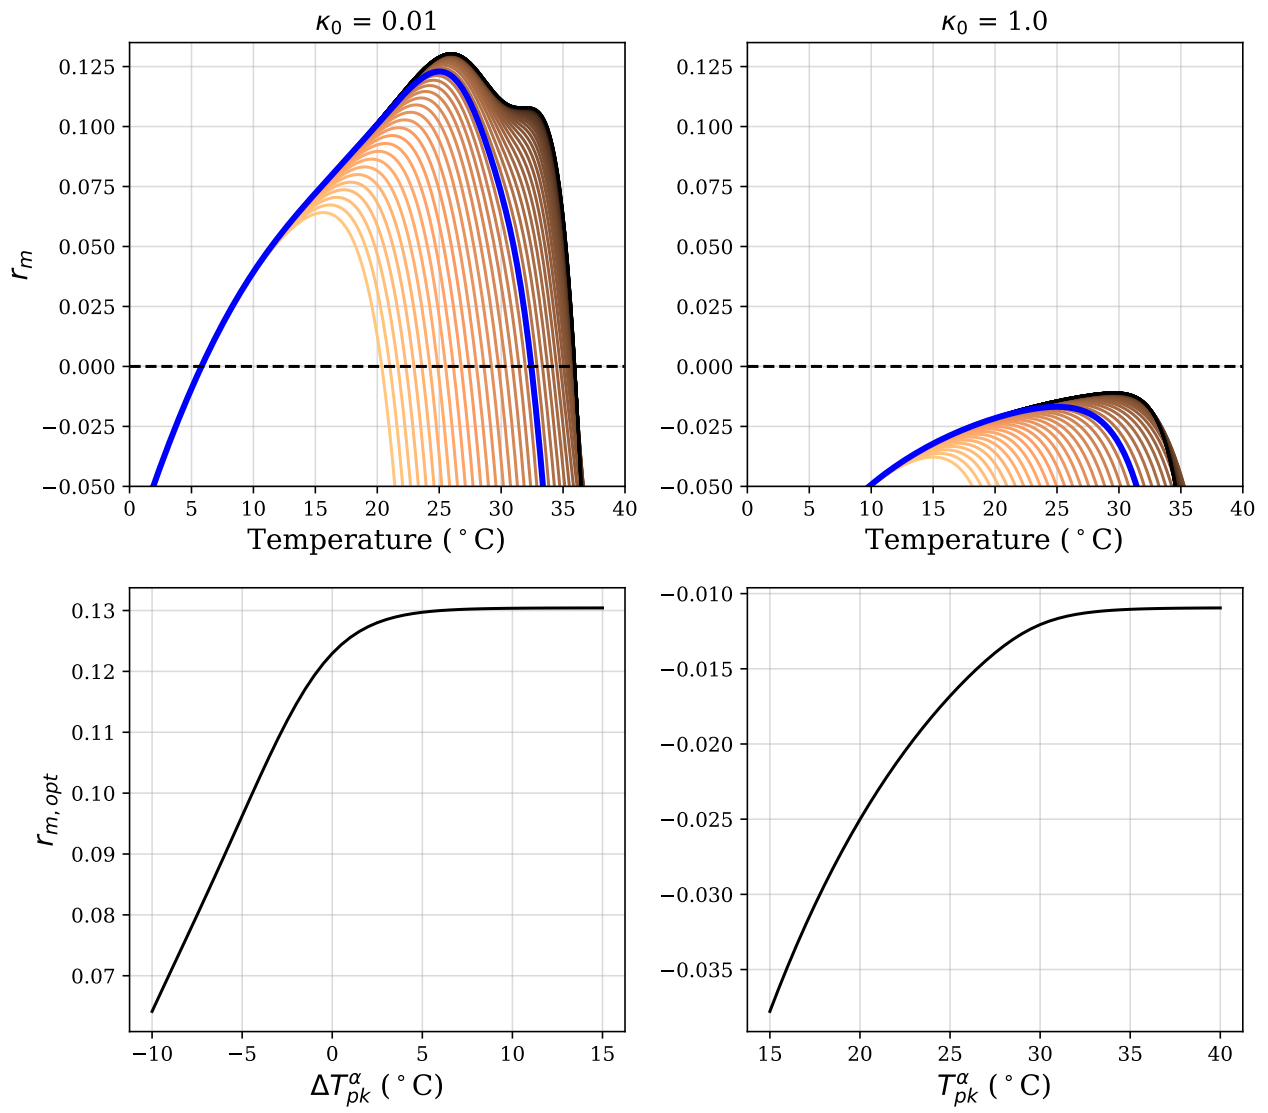

**Supplementary Figure 15:** Insensitivity of  $r_m$  selection gradient to changes in  $\kappa_0$

## 73 1.8 Macroevolutionary patterns and phylogenetic constraints

**Supplementary Table 1:** Nucleotide sequences collected for each species from the SILVA (SSU and LSU) and Barcode of Life Data System (COI-5P) databases.

| Species                             | SSU ID                   | LSU ID                   | COI-5P ID     |
|-------------------------------------|--------------------------|--------------------------|---------------|
| <i>Acyrtosiphon pisum</i>           | ABLF02002530.1.2075      | F02004049.1.2297         | -             |
| <i>Aedes aegypti</i>                | AAGE02033765.6222.8206   | AAGE02025420.70.4046     | CULSA016-19   |
| <i>Aedes albopictus</i>             | GCLM01041991.604.2545    | MNAF02000533.14119.17736 | ACMIP154-07   |
| <i>Aedes krombeini</i>              | -                        | -                        | -             |
| <i>Amblyseius swirskii</i>          | -                        | -                        | GBMNC68842-20 |
| <i>Amblyseius womersleyi</i>        | -                        | -                        | GBCH5643-13   |
| <i>Anopheles gambiae</i>            | AM157179.1.2015          | LCWJ01002898.1.3298      | CULSA066-19   |
| <i>Anoplophora glabripennis</i>     | -                        | -                        | GBMNE15612-21 |
| <i>Antestiopsis thunbergii</i>      | -                        | -                        | -             |
| <i>Anthonomus grandis</i>           | EU215423.9073.11005      | EU215423.12455.16248     | GBMIN12012-13 |
| <i>Aphis gossypii</i>               | -                        | -                        | ACEA143-14    |
| <i>Aphis nasturtii</i>              | -                        | -                        | ACEA530-14    |
| <i>Aubeonymus mariaefrancisciae</i> | -                        | -                        | -             |
| <i>Aulacorthum solani</i>           | AF487713.1.966           | -                        | ACEA131-14    |
| <i>Bemisia argentifolii</i>         | -                        | -                        | -             |
| <i>Bemisia tabaci</i>               | GCZW01018184.195.2694    | -                        | BTB002-12     |
| <i>Callosobruchus analis</i>        | -                        | -                        | GBCCH430-13   |
| <i>Callosobruchus chinensis</i>     | -                        | -                        | CSP030-09     |
| <i>Callosobruchus maculatus</i>     | GEUE01061439.889.2802    | GEUD01155100.99.2572     | GBCCH431-13   |
| <i>Callosobruchus rhodesianus</i>   | -                        | -                        | GBCL2570-06   |
| <i>Clavigralla tomentosicollis</i>  | GAJX01000019.410.2325    | -                        | GBMNA17782-19 |
| <i>Culex annulirostris</i>          | -                        | -                        | GBMNC791-20   |
| <i>Culex pipiens</i>                | AY988445.1.1858          | -                        | CULSA020-19   |
| <i>Culex quinquefasciatus</i>       | AAWU01003351.41983.43837 | AAWU01047416.6583.8759   | GBDP12712-12  |
| <i>Dactylopius austrinus</i>        | AY795538.1.608           | -                        | -             |
| <i>Drosophila suzukii</i>           | AWUT01011932.32096.34063 | AWUT01017126.2.3394      | GBDPD245-14   |
| <i>Gastrolina depressa</i>          | -                        | -                        | GBMNA17939-19 |
| <i>Halyomorpha halys</i>            | GEDY01000115.149.2061    | GBHT01004590.7.2044      | AGIRI147-17   |
| <i>Harmonia axyridis</i>            | KP419116.1.1832          | -                        | GBCL17655-14  |
| <i>Helicoverpa armigera</i>         | KT343378.1.1903          | -                        | GBGL29849-19  |
| <i>Hyalobius transversovittatus</i> | -                        | -                        | GBCL3480-08   |
| <i>Hyperaspis notata</i>            | -                        | -                        | HEAUG012-12   |
| <i>Iphiseius degenerans</i>         | -                        | -                        | TZBCA378-07   |
| <i>Kampimodromus aberrans</i>       | -                        | -                        | -             |
| <i>Laricobius nigrinus</i>          | KP419143.1.1857          | -                        | GBCL9856-12   |
| <i>Leptinotarsa decemlineata</i>    | GEEF01054810.5881.7790   | -                        | FBCOP312-13   |
| <i>Macrocentrus iridescens</i>      | -                        | -                        | BBHEC285-09   |
| <i>Macrosiphum euphorbiae</i>       | -                        | -                        | ACEA250-14    |
| <i>Monochamus leuconotus</i>        | -                        | -                        | -             |
| <i>Muscidifurax raptorellus</i>     | -                        | -                        | -             |
| <i>Muscidifurax zaraptor</i>        | -                        | -                        | -             |
| <i>Myzus persicae</i>               | LXJY01000320.20922.22509 | -                        | GBMNE22299-21 |
| <i>Ophraella communis</i>           | -                        | -                        | GBCCH11138-19 |
| <i>Otiorynchus sulcatus</i>         | AF250084.1.1795          | -                        | COLFD838-12   |
| <i>Paracoccus marginatus</i>        | FIZT01020513.6507.8206   | -                        | GBMIN46559-16 |
| <i>Phenacoccus solenopsis</i>       | -                        | -                        | GBMHH29894-19 |
| <i>Planococcus citri</i>            | GAXF02029206.892.3340    | -                        | GBMIN46549-16 |
| <i>Plutella xylostella</i>          | AHIO01004014.23148.25041 | -                        | AACTA1852-20  |
| <i>Rhopalosiphum maidis</i>         | -                        | -                        | ACEA794-14    |
| <i>Scapsipedus icipe</i>            | -                        | -                        | GBMOR7430-19  |
| <i>Sepedon spinipes</i>             | -                        | -                        | FIDIP848-12   |
| <i>Stethorus punctillum</i>         | EF512328.1.1788          | -                        | ASCMT030-11   |
| <i>Tetraneura nigriabdominalis</i>  | -                        | -                        | ASHMT220-11   |
| <i>Tetranychus evansi</i>           | AB926295.1.1858          | -                        | GACAC126-12   |
| <i>Tetranychus mcDanieli</i>        | -                        | -                        | -             |
| <i>Tetranychus urticae</i>          | CAEY01001788.15245.16831 | AY750693.1.2826          | GACAC6465-19  |
| <i>Thrips hawaiiensis</i>           | -                        | -                        | AGIMP052-16   |
| <i>Toxoptera citricida</i>          | AY216697.1.2480          | -                        | RDBA411-06    |
| <i>Tribolium castaneum</i>          | HM156711.1.1831          | -                        | BIPR011-13    |
| <i>Trichogramma bruni</i>           | -                        | -                        | -             |
| <i>Trichogramma sp. nr. Lutea</i>   | -                        | -                        | KMPUH785-19   |

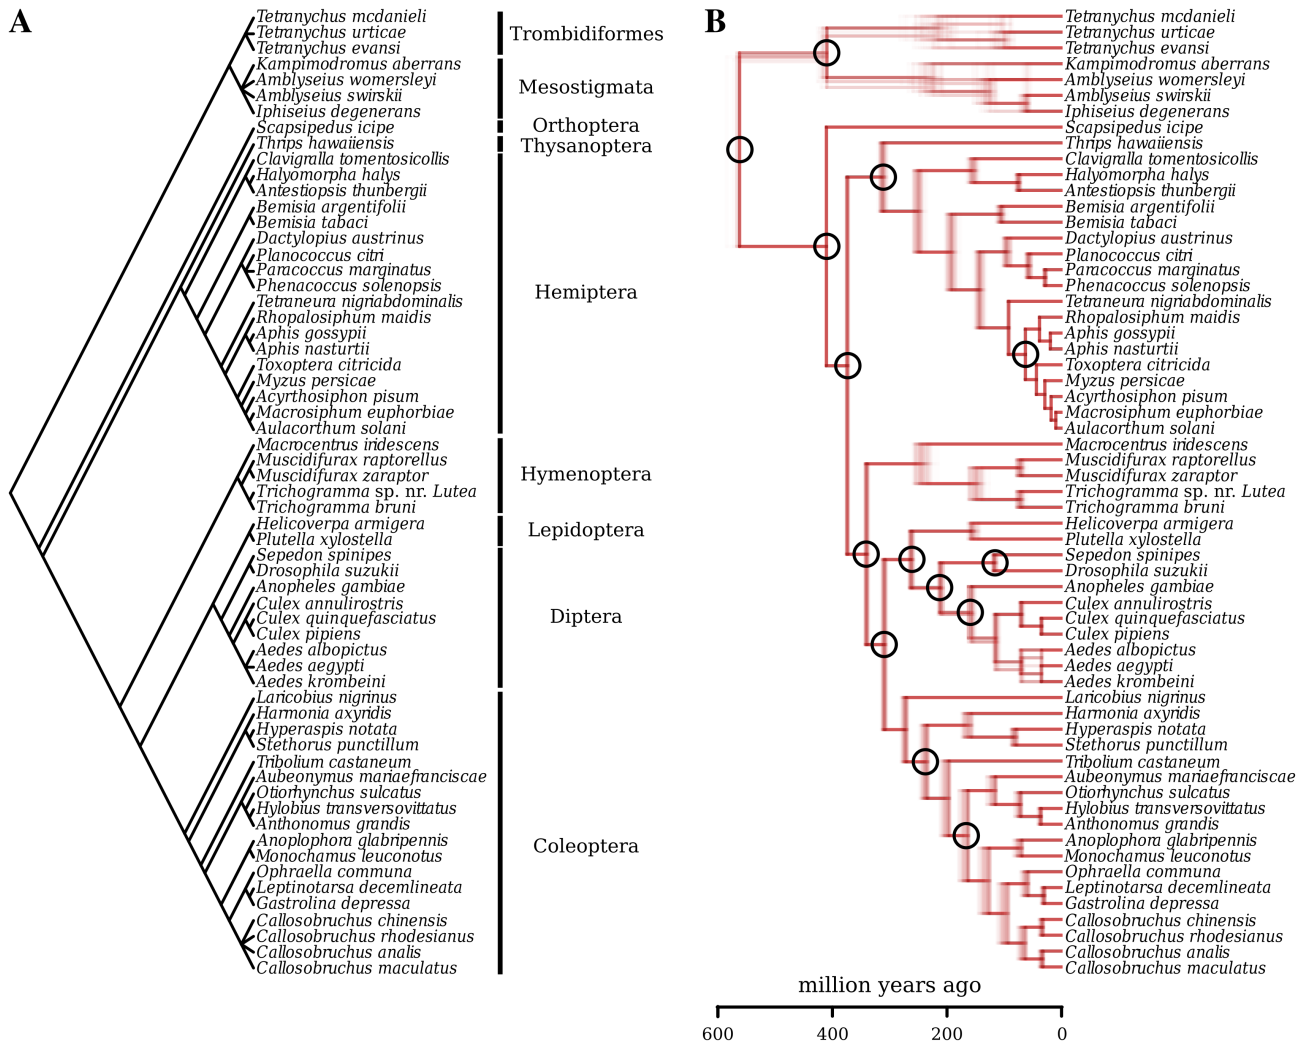

**Supplementary Figure 16:** A: The Open Tree of Life topology for the species in the study, with orders explicitly shown. Note that this topology includes some polytomies (e.g., see the *Callosobruchus* and *Tetranychus* clades). B: The final set of 100 time-calibrated trees overlaid on top of each other. Differences in both topology and branch lengths can be observed. Some polytomies from panel A were objectively resolved (e.g., the *Callosobruchus* clade) based on the concatenated sequence alignment. In contrast, where sequence data were completely missing for at least one species (e.g., the *Tetranychus* clade), polytomies were randomly resolved. Nodes whose age was obtained from the TimeTree database are marked with a circle. The two panels were plotted with the ape [7] (v.5.6-2) and phytools R packages [8] (v.1.2-0), respectively.

## 74 References

- 75 [1] Savage, V. M., Deeds, E. J. & Fontana, W. Sizing up allometric scaling theory. *PLoS computational*  
76 *biology* **4**, e1000171 (2008).
- 77 [2] Savage, V. M. *et al.* Effects of body size and temperature on population growth. *Am. Nat.* **163**, 429–41  
78 (2004).
- 79 [3] Kontopoulos, D.-G. *et al.* Phytoplankton thermal responses adapt in the absence of hard thermody-  
80 namic constraints. *Evolution* **74**, 775–790 (2020).
- 81 [4] Frazier, M., Huey, R. B. & Berrigan, D. Thermodynamics constrains the evolution of insect population  
82 growth rates:“warmer is better”. *Am. Nat.* **168**, 512–520 (2006).
- 83 [5] Pawar, S., Dell, A. I., Savage, V. M. & Knies, J. L. Real versus Artificial Variation in the Thermal  
84 Sensitivity of Biological Traits. *Am. Nat.* **187**, E41–E52 (2016).
- 85 [6] Huey, R. B. *Evolutionary physiology of insect thermal adaptation to cold environments*, 223–241 (Cam-  
86 bridge University Press, 2010).
- 87 [7] Paradis, E. & Schliep, K. ape 5.0: an environment for modern phylogenetics and evolutionary analyses  
88 in R. *Bioinformatics* **35**, 526–528 (2019).
- 89 [8] Revell, L. J. phytools: an R package for phylogenetic comparative biology (and other things). *Methods*  
90 *in Ecology and Evolution* **3**, 217–223 (2012).
