# Supplementary material for: Variation in temperature of peak trait performance constrains adaptation of arthropod populations to climatic warming
Source: Nat Ecol Evol. 2024 Jan 25;8(3):500–10. doi: 10.1038/s41559-023-02301-8 (PMC10927549; doi:10.1038/s41559-023-02301-8)
Supplement: Supplementary file 4 — Auxiliary Supplementary File (Appendix 2) containing detail and code of how Main text equation 2 was derived. [file 41559_2023_2301_MOESM4_ESM.pdf]

[illegible]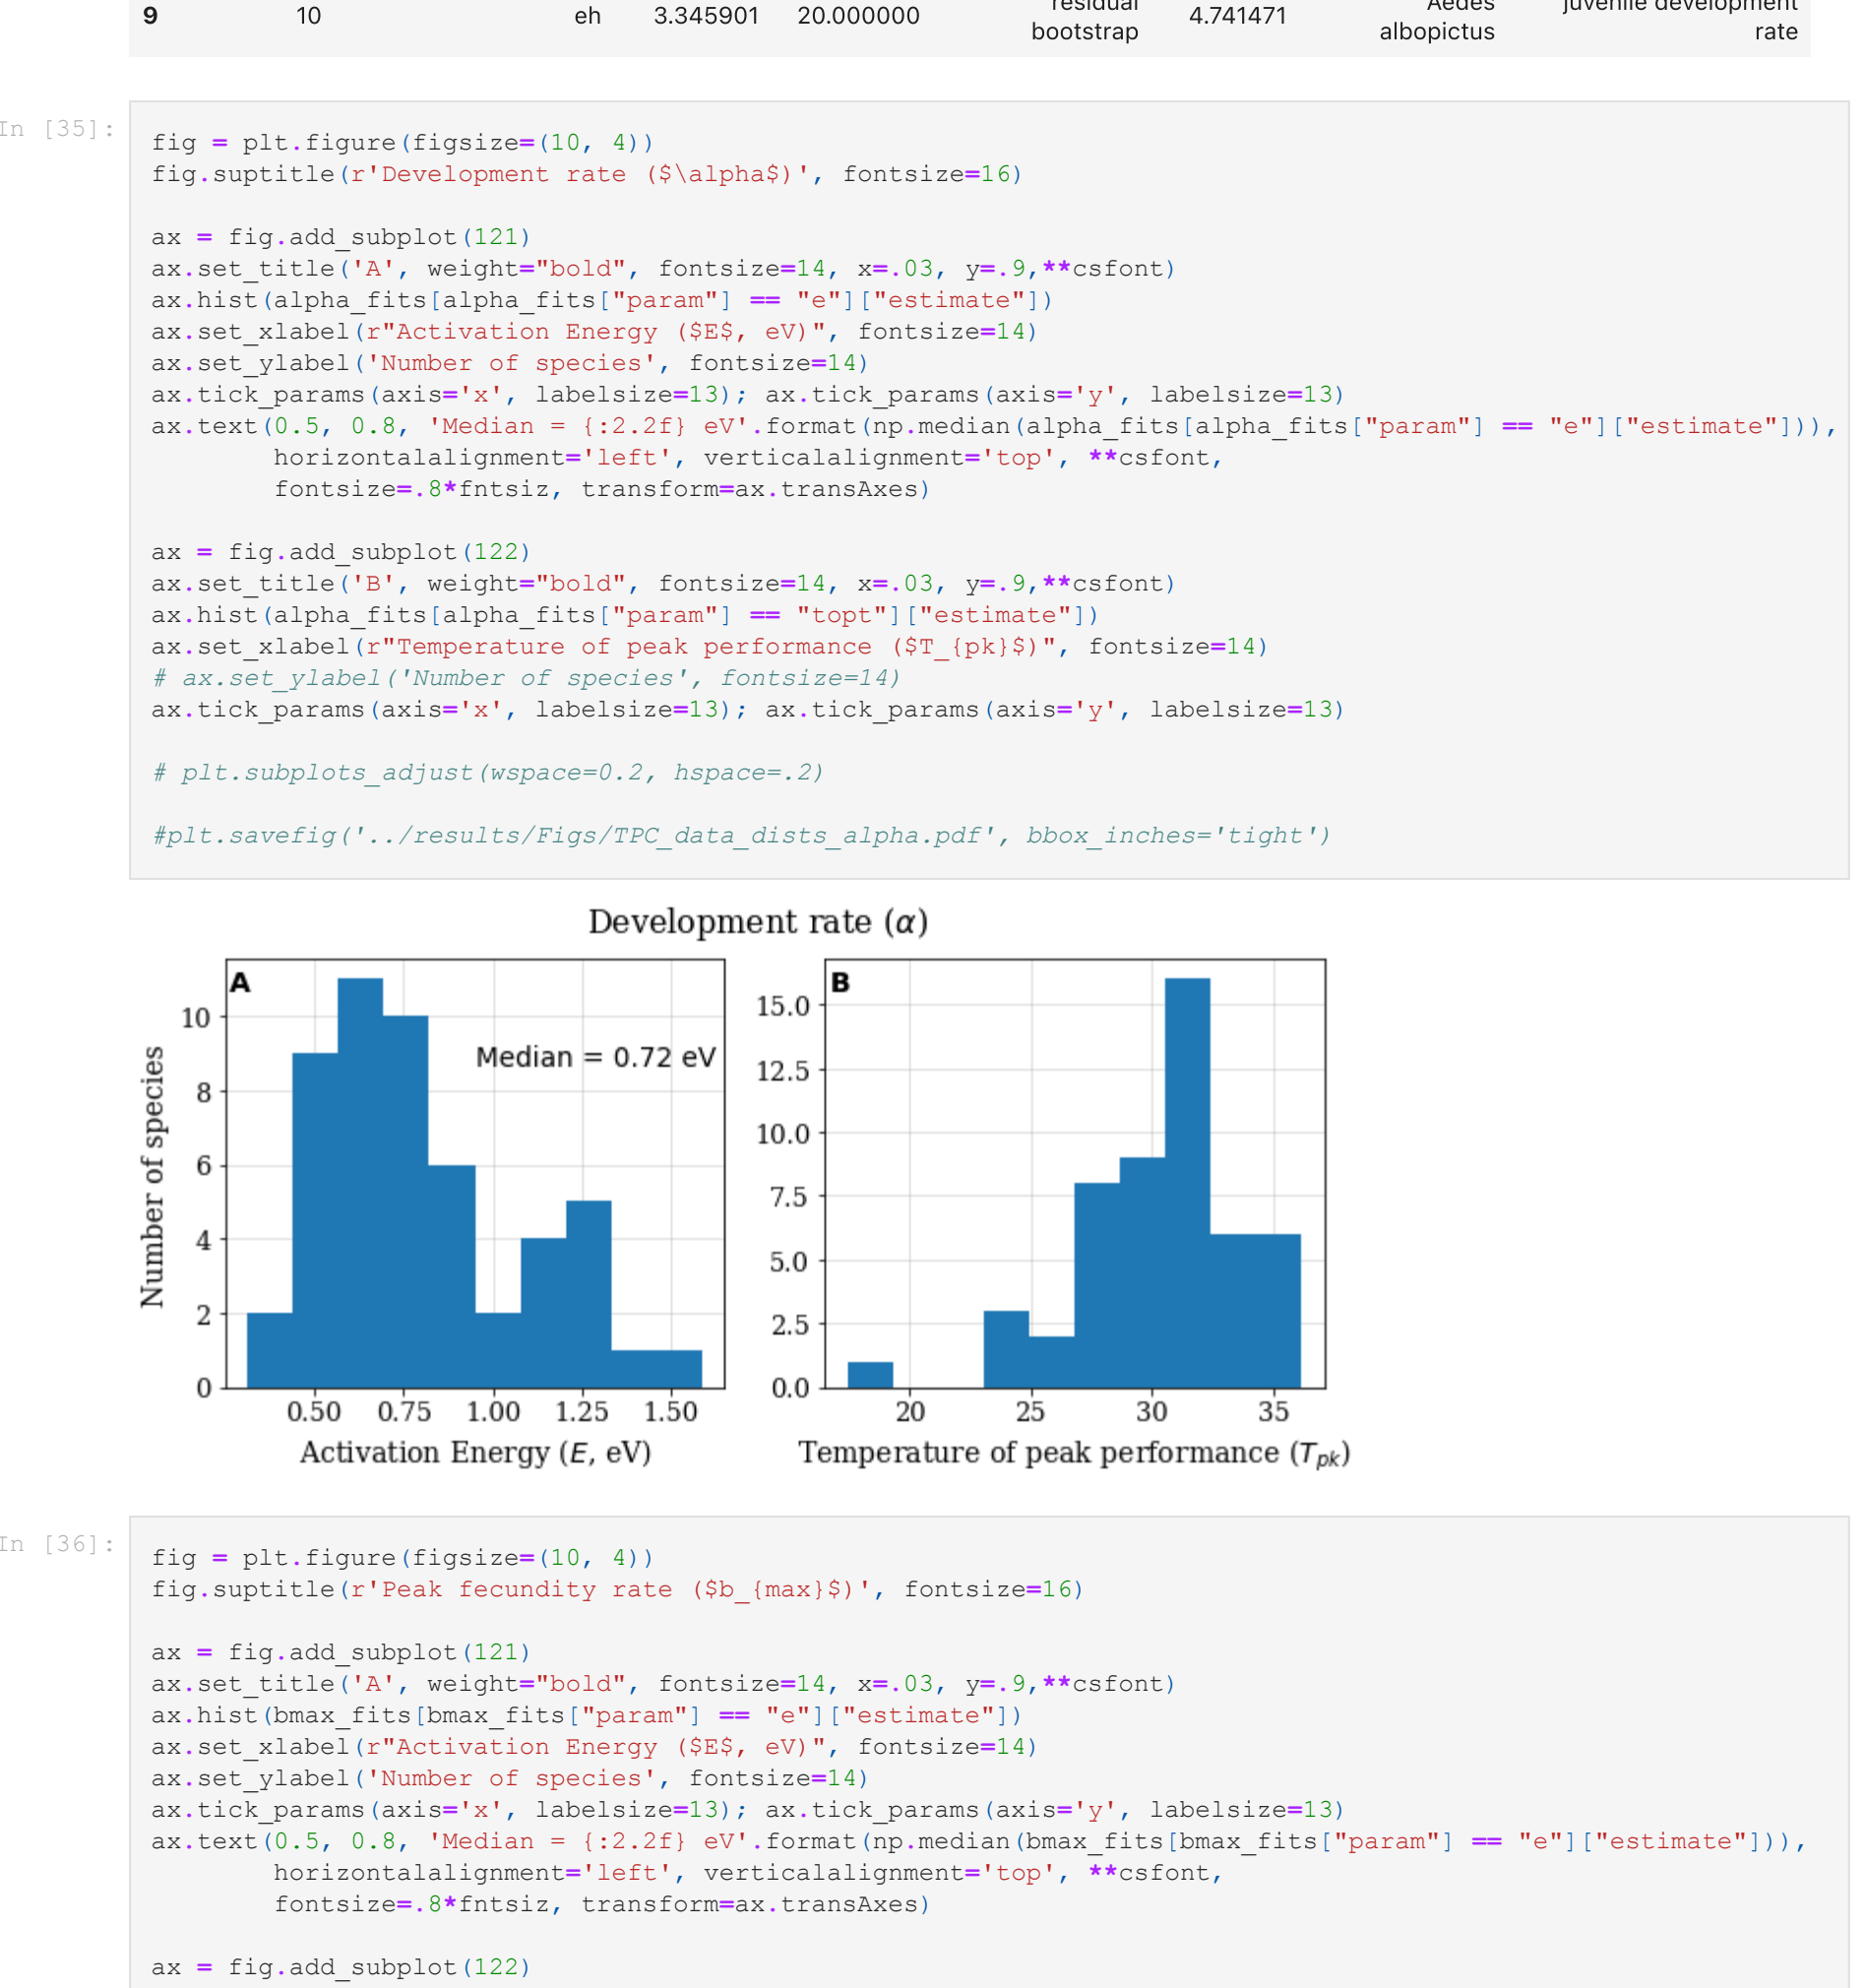

```
ax.set_title('B', weight='bold', fontsize=14, x=0.3, y=5, **fontconf)
ax.hist(bmax_dists[bmax_dists['Team']=='Toshiba'], bins='top', **fontconf)
ax.set_xlabel('Temperature of peak performance (ΣT [pk]s)', fontsize=14)
# ax.set_xlabel('Number of species', fontsize=14)
ax.tick_params(axis='x', labelsize=13)
ax.tick_params(axis='y', labelsize=13)

plt.subplots_adjust(wspace=0.2, hspace=0.0)

# plt.savefig('..results/G1/TPC_dists_bmax.pdf', bbox_inches='tight')
```

The figure contains two histograms. The left histogram shows the distribution of species across energy bins from 1 to 5 eV. The y-axis is 'Number of species' (0 to 12) and the x-axis is 'Energy (eV)' (1 to 5). The distribution is skewed to the right, with a peak at 1 eV (12 species) and a median of 1.16 eV. The right histogram shows the distribution of species across energy bins from 20 to 35 eV. The y-axis is 'Number of species' (0 to 8) and the x-axis is 'Energy (eV)' (20 to 35). The distribution is also skewed to the right, with a peak at 30 eV (8 species).

[illegible]

```

# fontsize = 8 (fontsize, transform=transform_axes)
horizontalalignment='left', verticalalignment='top', **cfsfont,
fontsize=8(fontsize, transform=transform_axes))

ax.set_title('Weighted (b22)')
ax.hist2d(fits[j].fits['b22'], fontsize=14, w=0.3, y=9, **cfsfont)
ax.text(0.5, fits[j].fits['pmax'] = 'top') # text=10)
ax.set_xlabel('Temperature of peak formation (Tp[p3]K)', fontsize=14)
# ax.set_ylabel('Number of species', fontsize=14)
ax.tick_params(axis='x', labelsize=13)
ax.tick_params(axis='y', labelsize=13)

plt.subplots_adjust(wspace=0.2, hspace=0.0)

# plt.savefig('.../results/GI/TPC_data_data_bmax.pdf', bbox_inches='tight')

```

Figure 2 consists of two histograms, A and B, showing the distribution of juvenile mortality rate ( $z$ ). Both histograms have 'number of species' on the y-axis and 'juvenile mortality rate ( $z$ )' on the x-axis. The x-axis ranges from 0 to 2.5 with major ticks every 0.5 units. The y-axis ranges from 0 to 14 with major ticks every 2 units. Histogram A (left) shows the distribution for 15 species, with a median of 1.57. The distribution is skewed to the right, with a peak at  $z \approx 0.5$  (14 species) and a secondary peak at  $z \approx 1.5$  (10 species). Histogram B (right) shows the distribution for 15 populations, with a median of 1.57. The distribution is also skewed to the right, with a peak at  $z \approx 1.5$  (10 populations) and a secondary peak at  $z \approx 2.0$  (8 populations).

Figure 10: Histograms of the activation energy ( $E_a$ ) and the temperature of peak performance ( $T_{pk}$ ) for the materials in the dataset. The left histogram shows the distribution of  $E_a$  (eV) from 0 to 30, with a peak around 5-10 eV. The right histogram shows the distribution of  $T_{pk}$  (K) from 0 to 30, with a peak around 10-15 K. Both histograms have a y-axis labeled 'Z' ranging from 0 to 2.

```

In [38]: fig = plt.figure(figsize=(10,4))
fig.suptitle('Sublimation mortality rate (Sz)', fontsize=16)
ax = fig.add_subplot(121)
ax.set_title('A', weight='bold', fontsize=14, x=0.03, y=0.9, **csetfont)

```

```
ax.hist(z_fits["fits"]["param"], bins=10, color='r')
ax.set_xlabel("Activation Energy (Eact) eV, Label={}".format(labelname))
ax.set_ylabel('Number of species, fontsize=14)
ax.tick_params(axis='x', labelbottom=3) ax.tick_params(axis='y', labelleft=3)
ax.text(0.5*(8.0, 'Median = (12.2f).0').format(np.median(z_fits["fits"]["param"])),
        horizontalalignment='right', verticalalignment='top', **cosfont,
        fontsize=9*fontsize, transform=ax.transAxes)

ax = fig.add_subplot(122)
ax.set_title('B', weight='bold', fontsize=14, x=0.3, y=9, **cosfont)
ax.hist(z_fits["fits"]["param"], bins=10, color='g')
ax.set_xlabel("Temperature of peak performance (GT [°C]), fontsize=14)
ax.set_ylabel('Number of species, fontsize=14)
ax.tick_params(axis='x', labelbottom=3) ax.tick_params(axis='y', labelleft=3)
```

```
plt.subplots_adjust(wspace=0.2, hspace=.00)
```

```
fig.savefig('.../results/G1/TFC_data_dists_bmax.pdf', bbox_inches='tight')
```

Adult mortality rate (z)

Figure 10 displays two bar charts, (a) and (b), showing the distribution of species across different categories. Chart (a) shows a distribution with a median value of -0.37 eV. Chart (b) shows a distribution with a median value of 6. The x-axis for both charts is labeled 'Adult mortality rate (z)'.

| Chart | Category   | Value |
|-------|------------|-------|
| (a)   | Category 1 | 17.5  |
|       | Category 2 | 15.0  |
| (b)   | Category 1 | 8     |
|       | Category 2 | 6     |

Now set the temperature ranges for the potential trial  $T_{pe}$ 's and their  $E$  values using these real data:

```
[391] max_T_vec = np.zeros(1)
max_T_vec = np.arange(0, max_T_vec, 0.05)*273.15 # Vector of temperatures
kappa_vec = _ljam(B_0_kappa, 0, max_T_vec)*273.15, T_ref_vec, E_0_kappa, kpar_T_vec) # keep kappa's TPC fixed as it has an
np.random.seed(720) # Set seed to generate the specific results used in the manuscript (changing the seed does
kappa_vec = np.zeros(1000) # generate 1000 kappa values
T_vec = np.random.uniform(1, 4)*273.15 # generate uniform random T_pks in Kelvin for the 4 p
T_opt_vec = np.zeros(1000, 1)

for i in range(1000): # THIS WILL GENERATE SOME EXTREME VALUE HANNINGS RICH MORTALITY RATES RAR UP TO HIGH A
    alp_vec = np.linspace(0.1, 0.9, 10) # alp = 0.1, 0.2, 0.3, 0.4, 0.5, 0.6, 0.7, 0.8, 0.9
    alp_vec = _ljam(B_0_kappa, 0, alp_vec)*273.15, T_ref_vec, E_0_kappa, kpar_T_vec)
    alp_vec = _ljam(B_0_kappa, 0, alp_vec)*273.15, T_ref_vec, E_0_kappa, kpar_T_vec)
```

[illegible]

```
sim_results = ps_data.groupby('r_m_opt').agg(
    sim_results = pd.DataFrame(
        columns = ['T_pk_sums', 'T_pk_vars', 'r_m_opt', 'T_opt', 'Opt_T_pk_order'])
sim_results.head()
```

|   | T_pk_sums | T_pk_vars | r_m_opt  | T_opt | Opt_T_pk_order |
|---|-----------|-----------|----------|-------|----------------|
| 0 | 87.195367 | 58.642862 | 0.076453 | 15.95 | 0.0            |
| 1 | 90.660932 | 44.143652 | 0.148928 | 19.80 | 0.0            |
| 2 | 89.668608 | 69.880779 | 0.062348 | 14.50 | 0.0            |
| 3 | 68.689012 | 77.539396 | 0.012438 | 11.75 | 0.0            |

```
4 58.033695 108.282726 0.002569 11.00 0.0
```

```
In [32]: sim_results.to_csv("../results/sim_results.csv", index=False)
```

```
In [32]: fig = plt.figure(figsize=(10, 4))  
ax = fig.add_subplot(121)  
ax.set_title("A", weight="bold", fontsize=14, x=0.3, y=0.9, color="r")  
ax.scatter(sim_results["T_pk_sum"], sim_results["r_max"],  
           s=70, alpha=0.5, facecolor="r", edgecolor="k")  
ax.scatter(sim_results.loc[sim_results["Opt_T_pk_order"] == 1][["T_pk_sum"]],
```

```

        color = "gainsboro", size=70, align="center",
        ax.set_xlabel("Sum of  $\Gamma(p_k|k)^2$ ", fontsize=4)
        ax.set_ylabel("Maximum population Vm growth rate at  $\Gamma(p_k|k)$ ", fontsize=14)
        ax.tick_params(axis='x', labelsize=13)
        ax.tick_params(axis='y', labelsize=13)

    # fig.add_subplot(122)
    ax.set_title('b', weight="bold", fontsize=14, loc="top", y3="%cfacet")
    ax.scatter(sim_results["pk_k_vars", "sim_results", "n_opt"],
              size=70, alpha=0.75, facecolor="k", edgecolor="k")
    ax.scatter(sim_results["logsim_results", "Opt", "pk_k_vars"],
              size=70, alpha=0.75, facecolor="k", edgecolor="k")
    ax.set_xlabel("Sum of  $\Gamma(p_k|k)^2$ ", fontsize=4)
    ax.set_ylabel("Variance of  $\Gamma(p_k|k)^2$ ", fontsize=14)

```

```
ax.tick_params(axins='x', labelsizew=13) ax.tick_params(axins='y', labelsizew=13)
ax.axes.yaxis.set_ticklabels([])

plt.subplots_adjust(wspace=0.02, hspace=0.00)

# plt.savefig('.../results/Figs/TherM0_grad.pdf', bbox_inches='tight')
```

Now let's overlay the real  $T_{pi}$ s on the calculated fitness regions to see where the real data lie relative to the predicted fittest

```

In [43]: real_r_m_opt = pd.read_csv('.../results/rm_optSizeScaling_w_tpkums.csv')
          real_r_m_opt.head()

Out[43]:
```

|   | species                  | temp      | alpha      | alphaLwr   | alphaUpr   | curve_ID | bmax     | bmaxLwr  | bmaxUpr   | z ...    | kappa | rm   |       |
|---|--------------------------|-----------|------------|------------|------------|----------|----------|----------|-----------|----------|-------|------|-------|
| 0 | Aedes<br>aegypti         | 33.108108 | 5.430507   | 6.139773   | 4.974288   | 3        | 8.966715 | 6.913063 | 10.168002 | 0.047646 | ...   | 0.01 | 0.197 |
| 1 | Anopheles<br>glaberrimis | 27.972973 | 297.190161 | 316.589257 | 275.438861 | 1        | 3.279634 | 2.502936 | 4.185761  | 0.018340 | ...   | 0.01 | 0.012 |

|   |                   |           |           |           |          |   |          |          |           |          |     |      |       |
|---|-------------------|-----------|-----------|-----------|----------|---|----------|----------|-----------|----------|-----|------|-------|
| 2 | Anthrenus grandis | 29.459450 | 11.006110 | 13.270318 | 9.919390 | 4 | 6.282494 | 5.369757 | 10.030917 | 0.040689 | ... | 0.01 | 0.143 |
| 3 | Aphis gossypii    | 28.243243 | 4.573511  | 4.799221  | 4.398641 | 6 | 3.206500 | 2.552281 | 3.740294  | 0.112792 | ... | 0.01 | 0.235 |
| 4 | Aphis nasturtii   | 25.855856 | 6.736810  | 7.193387  | 6.425259 | 2 | 2.982066 | 2.598976 | 3.421900  | 0.065587 | ... | 0.01 | 0.147 |

```
fig = plt.figure(figsize=(5, 4))
ax = fig.add_subplot(1, 1, 1)

ax.scatter(sim_results["pk_sum"], sim_results["n_opt"],
           s=70, alpha=0.75, facecolor='k', edgecolor='k')
ax.scatter(sim_results.loc[sim_results["Opt_pk_order"] == 1]["pk_sum"],
           sim_results.loc[sim_results["Opt_pk_order"] == 1]["n_opt"],
           color='gainsboro', s=70, alpha=1)
ax.scatter(real_n_opt["sum"], real_n_opt["maxCox"],
           color='blue', s=100, alpha=.7)

ax.set_xlabel("Sum of 27, [pk_sum], fontsize=14")
ax.set_ylabel("Maximum population in growth rate at 27, [n_opt] (d), fontsize=14;
              Maximum population in growth rate at 27, [pk_order] at risk node [n_opt], fontsize=14")
```

```
plt.savefig('.../results/Theory0_grad_with_data.pdf', bbox_inches='tight')
```

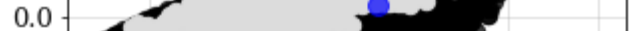

```
In [45]: fig = plt.figure(figsize=(5, 4))
ax = fig.add_subplot(1, 1, 1)
ax.scatter(sim_results["Tt_pk_vars"], sim_results["r_n_opt"],
           s=70, alpha=0.75, facecolors='k', edgecolors='k')
ax.scatter(sim_results["logism_results"]["Sum of Jpa's"],
           sim_results["logism_results"]["Tt_pk_vars"],
           s=70, alpha=0.75, facecolors='b', edgecolors='b')
```

```
ax.scatter(sim_results["sim_results"], ax.get_xlim(), color='ginsbuor', s=70, alpha=.8)
ax.set_xlabel("Maximum population N growth rate at Topt", fontsize=14)
ax.set_ylabel("Relative fitness Frel(Topt)", fontsize=14)
ax.tick_params(axis='x', labelsize=3)
ax.savefig("../results/Figs/ToptNw_grad_with_data_2.pdf", bbox_inches='tight')
```

Thus most observed  $\tau_{\text{ages}}$  lie within the predicted fitness strategy regions.

## Sensitivity of the results to the parameterisation of fecundity loss rate ( $\kappa$ )

Fecundity typically declines over age, which can have significant impacts on the lifetime reproduction of individuals and therefore fitness. The rate at which fecundity declines with age ( $\kappa$ ) may be temperature-dependent, but there appears to be practically no existing data for these arthropods. Therefore, here we quantify the sensitivity of our theoretical predictions to changes in parameterisation of baseline fecundity loss rate ( $\kappa_0$ , the normalisation constant  $\kappa_0$ ). Specifically, we re-evaluate our trait sensitivity analyses, as well as our calculation of selection gradient by varying  $\kappa_0$  across two extreme values, around the value we have used to

[illegible]

```
ax.text(max(x_vec), 7, r'$kappa_0 = %s$' % str(kap_range[1]), horizontalalignment = 'right',
        verticalalignment = 'top', fontsize=18)
ax.plot(x_vec, v_vec, label=r'$kappa_0 = %s$' % str(kap_range[1]), ax_label=r'$kappa_0$ max', kap_range = [1],
        alip_par = x_vec, v_vec_label = 'right',
        verticalalignment = 'bottom', horizontalalignment = 'right',
        verticalalignment = 'bottom', fontsize=18)
ax.plot(x_vec, v_vec, label=r'$kappa_0 = %s$' % str(kap_range[2]), ax_label=r'$kappa_0$ max', kap_range = [2],
        alip_par = x_vec, v_vec_label = 'right',
        verticalalignment = 'bottom', horizontalalignment = 'right',
        verticalalignment = 'bottom', fontsize=18)
ax.plot(x_vec, v_vec, label=r'$kappa_0 = %s$' % str(kap_range[3]), ax_label=r'$kappa_0$ max', kap_range = [3],
        alip_par = x_vec, v_vec_label = 'right',
        verticalalignment = 'bottom', horizontalalignment = 'right',
        verticalalignment = 'bottom', fontsize=18)
ax.set_xlabel('Age (days)', fontsize=14)
ax.set_ylabel('Age (days)', fontsize=14)
ax.set_xlim(0, b_max_parr+1)
ax.set_ylim('f'(fmax(50, b), x_vec))
ax.set_title('"%s"' % kap_range[0], fontsize=14)
plt.savefig('%sresults/%s/kappa_plot.pdf', bbox_inches='tight')
```

Also, note that the TPC shape for  $\kappa$  remains the same (for the two meaningful extreme values of  $\kappa_0$ ):

```
In [47]: # kap_lo = min(kap_range)
         kap_lo = kap_range[1]
         kap_hi = max(kap_range)

         kap_vec_lo = B_lam(kap_lo, E_kap, T_pk_kap*473.15, T_ref_par, E_D_kap, k_par, T_vec)
         kap_vec_hi = B_lam(kap_hi, E_kap, T_pk_kap*473.15, T_ref_par, E_D_kap, k_par, T_vec)
```

```
fig = plt.figure(figsize=(8, 4))
ax = fig.add_subplot(121)
ax.plot('T_vvec-273.15, kap_vvec_lo',
ax.set_xlim([0,35])
ax.set_ylabel('Temperature (°C)', fontsize=14);
ax.set_ylabel('ε', fontsize=14)
ax.set_title('ε vs kappa_05 - ' + str(kap_lo), fontsize=13)
ax = fig.add_subplot(122)
ax.plot('T_vvec-273.15, kap_vvec_hi');
```

```
ax.set_xlim([0,35])
ax.set_xlabel("Temperature (°C)", fontsize=14);
ax.set_title("ε''(kappa_0) = " + str(kap_him), fontsize=14) ;
fig.layout()
plt.savefig("../results/St/kappa_plot_2.pdf", bbox_inches="tight")
```

```

First we re-evaluate the target sensitivity analysis vectors.

In [48]: T_vec = 273.15*np.arange(0, 40, 0.05) #Vector of temperatures

alp_vec = B_inv*(lam - O_alp)*alp_T.p_alp*(273.15 - ref_par_x_D_alp*k.par_T_vec)
B_inv = B_inv*(lam - O_bmax)*bmax_T.p_k_bmax*(273.15 - ref_par_x_D_bmax*k.par_T_vec)
z_vec = B_inv*(lam - O_z_r)*z_r.p_k*(273.15 - ref_par_x_D_z_r*k.par_T_vec)
z2_vec = B_inv*(lam - O_z2_r)*z2_r.p_k*(273.15 - ref_par_x_D_z2_r*k.par_T_vec)
k_vec = B_inv*(lam - O_k)*k.p_k*(273.15 - ref_par_x_D_k*k.par_T_vec)
kap_vec_hi = B_inv*(kap - h_i)*kap.p_kap*(273.15 - ref_par_x_D_kap*k.par_T_vec)

dr_dkap_vec = dr_dkap*(bmax_vec, alp_vec, z_vec, z2_vec, kap_vec, kap_vec_lo)

```

[illegible][illegible]

```
ax.set_xlabel('Temperature', fontsize=14)
ax.set_ylabel('P_{\text{rad}}(mW/cm^2)', fontsize=14)
plt.legend(['Full', 'x\Lambda/8\pi', '5\sigma_{\text{max}}', '5\sigma_{30}', '4\sigma', 'x\Lambda/8\pi(4\sigma_{\text{max}})', 'Lower\lower left']) #Add kappa=0.2
ax = fig.add_subplot(122)
ax.set_title('T=271.15,d_dsp_d_vac_hl, "black", linewidth=3, linestyle='-')
ax.set_xlabel('Lambda = 5 - 8 \mu m (Wavelength)', fontsize=14)
ax.plot(T_vec=271.15,d_dsp_d_vac_vec, 'blue')
ax.plot(T_vec=271.15,d_dsp_d_vac_vec, 'red')
ax.plot(T_vec=271.15,d_dsp_d_vac_vec, 'orange')
ax.plot(T_vec=271.15,d_dsp_d_vac_vec, 'cyan')
ax.plot(T_vec=271.15,d_dsp_d_vac_vec, 'purple')
ax.plot(T_pk_par, 'pk_par', [ax.get_xlim()[0],ax.get_xlim()[1]], color='k', linestyle='-', linewidth=1)
ax.legend(['Full', 'x\Lambda/8\pi', '5\sigma_{\text{max}}', '5\sigma_{30}', '4\sigma', 'x\Lambda/8\pi(4\sigma_{\text{max}})', 'Lower\lower left'])
```

```
ax.set_ylim([-0.048,0.02])
ax.set_xlabel('Temperature', fontsize=14)
plt.savefig('../results/SI/r_senna_kap.pdf', bbox_inches='tight')
```

As expected, in the case where baseline kappa ( $\kappa_0$ ) is lower, maximum fecundity ( $\beta_{max}$ ) becomes more important relative to  $\kappa$ , leaving the order of importance of the 5 traits the same as for the intermediate case ( $\kappa_0 = 0.1$ ) upon which our main results are

based.

### The selection gradients revisited

Next we re-evaluate the  $r_m$ , TPC and selection gradient as above. We focus only on the dominant trait  $\alpha$  because the order of the strengths of selection gradients is bound to remain unchanged due to the unchanged order of trait sensibility irrespective of the  $\kappa_0$  value (previous section).

[50]

```
fig = plt.figure(figsize=(9, 8))

ax = fig.add_subplot(221)
ax.set_title(r'$\kappa$ppa_00 = ' + str(kap_lo), fontsize=13)
ax.set_xlabel(r'Temperature ($^\circ$C)', fontsize=14)
ax.set_ylabel(r'$\delta_{\rm n}$', fontsize=14)

r_n_vec = r_SF_app_lam(bmax_vec, zJ_vec, z_vec, kap_vec_lo, alp_vec)
r_opt_vec = ["NA"]*len(T_pk_mm)

colormap = plt.cm.copper_r
ax.set_prop_cycle('color', [colormap(i) for i in np.linspace(0, 1, len(T_pk_mm))])

for i in range(len(T_pk_mm)):
    alp_mm_tmp_vec = B_inv_lam(B_0_alp, E_alp, T_pk_mm[i]*273.15, T_ref_mm, E_0_alp, k_par, T_vec)
    zJ_mm_tmp_vec = B_inv_lam(B_0_zJ, E_zJ, T_pk_mm[i]*273.15, T_ref_mm, E_0_zJ, k_par, T_vec)
    r_mm_tmp_vec = r_SF_app_lam(bmax_vec, zJ_mm_tmp_vec, z_vec, kap_vec_lo, alp_mm_tmp_vec)
    r_opt_vec[i] = max(r_mm_tmp_vec)

ax.plot(T_vec-273.15, r_mm_tmp_vec)

ax.plot(T_vec-273.15, r_n_vec, 'blue', linestyle='-', linewidth = 3)
ax.plot(T_vec-273.15, [0]*len(T_vec), "k--")
plt.ylim(-0.05, 0.135)
plt.xlim(0, 40)

ax = fig.add_subplot(223)
ax.plot(T_pk_mm - T_pk_par, r_opt_vec, 'black');
ax.set_xlabel(r'$\Delta T_{\rm [pk]}^{\rm opt}$ ($^\circ$C)', fontsize=14);
ax.set_ylabel(r'$\delta_{\rm n}$, opt$', fontsize=14)

ax = fig.add_subplot(222)
ax.set_title(r'$\kappa$ppa_00 = ' + str(kap_hi), fontsize=13)
ax.set_xlabel(r'Temperature ($^\circ$C)', fontsize=14);

r_n_vec = r_SF_app_lam(bmax_vec, zJ_vec, z_vec, kap_vec_hi, alp_vec)
r_opt_vec = ["NA"]*len(T_pk_mm)

ax.set_prop_cycle('color', [colormap(i) for i in np.linspace(0, 1, len(T_pk_mm))])

for i in range(len(T_pk_mm)):
    alp_mm_tmp_vec = B_inv_lam(B_0_alp, E_alp, T_pk_mm[i]*273.15, T_ref_mm, E_0_alp, k_par, T_vec)
    zJ_mm_tmp_vec = B_inv_lam(B_0_zJ, E_zJ, T_pk_mm[i]*273.15, T_ref_mm, E_0_zJ, k_par, T_vec)
    r_mm_tmp_vec = r_SF_app_lam(bmax_vec, zJ_mm_tmp_vec, z_vec, kap_vec_hi, alp_mm_tmp_vec)
    r_opt_vec[i] = max(r_mm_tmp_vec)

ax.plot(T_vec-273.15, r_mm_tmp_vec)

ax.plot(T_vec-273.15, r_n_vec, 'blue', linestyle='-', linewidth = 3)
ax.plot(T_vec-273.15, [0]*len(T_vec), "k--")
plt.ylim(-0.05, 0.135)
plt.xlim(0, 40)

ax = fig.add_subplot(224)
ax.plot(T_pk_mm, r_opt_vec, 'black');
ax.set_xlabel(r'$T_{\rm [pk]}^{\rm opt}$ ($^\circ$C)', fontsize=14);

fig.tight_layout()
plt.savefig('..results/SI/kappa_plot_3.pdf', bbox_inches='tight')
```

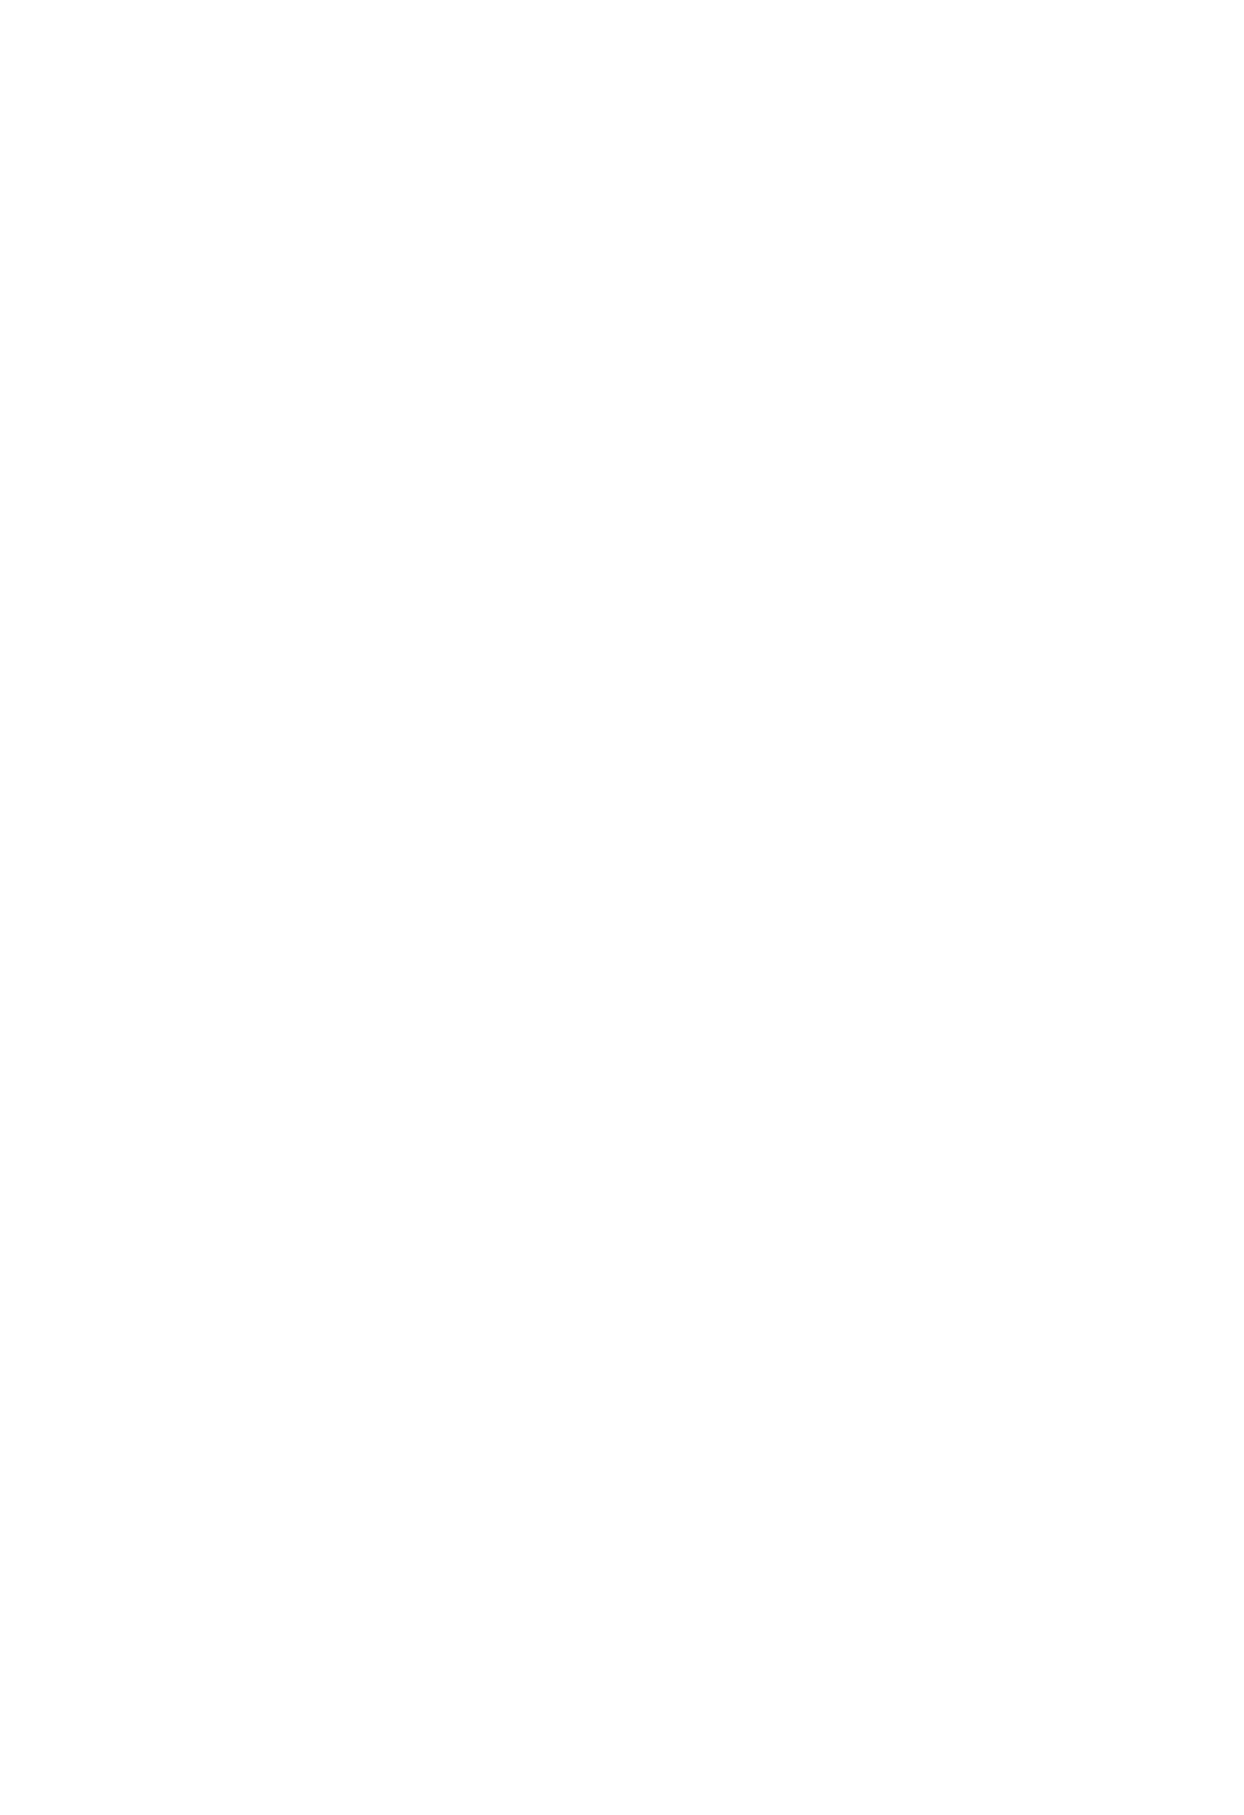

Thus the selection gradient remains qualitatively unchanged, with overall  $r_m$  lower when  $\kappa$  is high, as expected.
